# Supplementary material
Source: PubMed Central journal article supplement (PMC3993088)
Supplement: NIHMS544166-supplement-Supplementary_Material.pdf [file NIHMS544166-supplement-Supplementary_Material.pdf]

# THE LANCET

## **Supplementary webappendix**

This webappendix formed part of the original submission and has been peer reviewed. We post it as supplied by the authors.

Supplement to: Chronic Kidney Disease Prognosis Consortium. Association of estimated glomerular filtration rate and albuminuria with all-cause and cardiovascular mortality in general population cohorts: a collaborative meta-analysis. *Lancet* 2010; published online May 18. DOI:10.1016/S0140-6736(10)60674-5.

**Web Appendix for “Association of estimated glomerular filtration rate and albuminuria with all-cause and cardiovascular mortality: a collaborative meta-analysis of general population cohorts”**

**Lancet 2010; 375:**

|                 |                                                                                        |    |
|-----------------|----------------------------------------------------------------------------------------|----|
| Web Table 1.    | Participants/outcomes according to eGFR and ACR categories                             | 1  |
| Web Table 2.    | Participants/outcomes according to eGFR and dipstick categories                        | 4  |
| Web Table 3.    | P-values for interaction between eGFR and age in each study                            | 6  |
| Web Table 4.    | P-values for interaction between eGFR and albuminuria in each study                    | 7  |
| Web Table 5.    | Age-stratified adjusted HRs for all-cause mortality of categories of eGFR and ACR      | 8  |
| Web Table 6.    | Age-stratified adjusted HRs for CVD mortality of categories of eGFR and ACR            | 9  |
| Web Table 7.    | Age-stratified adjusted HRs for all-cause mortality of categories of eGFR and dipstick | 10 |
| Web Table 8.    | Age-stratified adjusted HRs for CVD mortality of categories of eGFR and dipstick       | 11 |
| Web Table 9.    | HRs for all-cause mortality according to eGFR splines in ACR studies                   | 12 |
| Web Table 10.   | HRs for CVD mortality according to eGFR splines in ACR studies                         | 13 |
| Web Table 11.   | HRs for all-cause mortality according to eGFR splines in dipstick studies              | 14 |
| Web Table 12.   | HRs for CVD mortality according to eGFR splines in dipstick studies                    | 15 |
| Web Table 13.   | HRs for all-cause mortality according to ACR splines                                   | 16 |
| Web Table 14.   | HRs for CVD mortality according to ACR splines                                         | 17 |
| Web Figure 1.   | eGFR splines and all-cause and CVD mortality in dipstick studies                       | 18 |
| Web Figure 2.   | Age-stratified eGFR splines and outcomes in ACR studies                                | 19 |
| Web Figure 3.   | Age-stratified eGFR splines and outcomes in dipstick studies                           | 20 |
| Web Figure 4.   | Forest plots of HRs for all-cause mortality at eGFR 45 and ACR 30 in ACR studies.      | 21 |
| Web Figure 5.   | Meta-regression of mortality for eGFR 45 (vs. 95) on % blacks                          | 22 |
| Web Appendix 1. | Acronyms/abbreviations for studies and key references.                                 | 23 |
| Web Appendix 2. | Distributed data analysis overview and analytic notes for individual studies           | 24 |
| Web Appendix 3. | Statistical models used in the study                                                   | 26 |
| Web References  |                                                                                        | 27 |

**Web Table 1. Distribution of participants\* and outcomes according to 28 categories of eGFR and ACR across studies.**

| Study                     | Total N | eGFR   | % Participants ACR (mg/g) |       |        |      | % Total deaths ACR (mg/g) |       |        |      | % CVD deaths ACR (mg/g) |       |        |      |
|---------------------------|---------|--------|---------------------------|-------|--------|------|---------------------------|-------|--------|------|-------------------------|-------|--------|------|
|                           |         |        | <10                       | 10-29 | 30-299 | 300+ | <10                       | 10-29 | 30-299 | 300+ | <10                     | 10-29 | 30-299 | 300+ |
| <b>Overall</b>            |         | 105+   | 12.3%                     | 3.8%  | 1.6%   | 0.2% | 5.2%                      | 3.2%  | 2.2%   | 0.4% | 3.4%                    | 2.5%  | 2.1%   | 0.2% |
| Participants              | 105715  | 90-104 | 14.6%                     | 3.9%  | 1.6%   | 0.2% | 7.2%                      | 4.1%  | 2.2%   | 0.6% | 5.9%                    | 3.9%  | 2.3%   | 0.7% |
| Total deaths              | 10983   | 75-89  | 21.7%                     | 6.0%  | 2.4%   | 0.3% | 12.9%                     | 7.5%  | 4.5%   | 0.7% | 10.9%                   | 7.7%  | 4.5%   | 1.0% |
| CVD deaths                | 3811    | 60-74  | 15.1%                     | 4.8%  | 2.2%   | 0.4% | 11.5%                     | 7.8%  | 5.3%   | 1.2% | 10.7%                   | 8.2%  | 6.1%   | 1.6% |
|                           |         | 45-59  | 3.7%                      | 1.7%  | 1.2%   | 0.3% | 5.4%                      | 4.7%  | 4.4%   | 1.3% | 5.8%                    | 5.7%  | 5.7%   | 1.7% |
|                           |         | 30-44  | 0.6%                      | 0.4%  | 0.5%   | 0.3% | 1.3%                      | 1.4%  | 2.2%   | 1.2% | 1.8%                    | 1.4%  | 2.4%   | 1.4% |
|                           |         | 15-29  | 0.0%                      | 0.1%  | 0.1%   | 0.2% | 0.2%                      | 0.2%  | 0.5%   | 0.8% | 0.4%                    | 0.2%  | 0.7%   | 0.8% |
| <b>Individual studies</b> |         |        |                           |       |        |      |                           |       |        |      |                         |       |        |      |
| <b>ARIC</b>               |         | 105+   | 8.5%                      | 1.8%  | 1.0%   | 0.2% | 8.1%                      | 2.4%  | 2.0%   | 0.7% | 5.5%                    | 1.6%  | 2.5%   | 0.2% |
| Participants              | 11392   | 90-104 | 18.9%                     | 2.9%  | 1.4%   | 0.2% | 14.4%                     | 3.7%  | 3.1%   | 0.9% | 11.2%                   | 3.7%  | 4.6%   | 1.8% |
| Total deaths              | 1224    | 75-89  | 25.2%                     | 3.4%  | 1.4%   | 0.3% | 15.8%                     | 4.5%  | 2.8%   | 0.8% | 13.5%                   | 3.2%  | 2.3%   | 1.6% |
| CVD deaths                | 438     | 60-74  | 21.7%                     | 2.9%  | 1.5%   | 0.4% | 15.5%                     | 3.5%  | 2.9%   | 1.5% | 13.5%                   | 2.7%  | 4.6%   | 2.5% |
|                           |         | 45-59  | 4.7%                      | 0.9%  | 0.9%   | 0.2% | 5.7%                      | 2.4%  | 2.9%   | 0.8% | 6.6%                    | 3.7%  | 4.8%   | 0.9% |
|                           |         | 30-44  | 0.6%                      | 0.1%  | 0.3%   | 0.2% | 1.2%                      | 0.4%  | 1.6%   | 1.3% | 1.4%                    | 0.7%  | 2.3%   | 2.1% |
|                           |         | 15-29  | 0.0%                      | -     | 0.0%   | 0.1% | 0.2%                      | -     | 0.2%   | 0.9% | 0.5%                    | -     | 0.5%   | 1.8% |
| <b>AusDiab</b>            |         | 105+   | 3.8%                      | 0.8%  | 0.3%   | 0.0% | 2.3%                      | 0.6%  | 0.3%   | 0.2% | 1.2%                    | 0%    | 0.6%   | 0%   |
| Participants              | 11240   | 90-104 | 12.6%                     | 2.2%  | 0.8%   | 0.1% | 5.0%                      | 1.5%  | 0.3%   | 0.3% | 2.4%                    | 1.2%  | 0%     | 0.6% |
| Total deaths              | 664     | 75-89  | 31.6%                     | 5.6%  | 1.6%   | 0.2% | 14.2%                     | 6.6%  | 3.8%   | 0.2% | 9.6%                    | 4.8%  | 6.0%   | 0%   |
| CVD deaths                | 166     | 60-74  | 25.1%                     | 4.6%  | 1.8%   | 0.1% | 16.1%                     | 10.2% | 6.9%   | 0.6% | 14.5%                   | 11.4% | 5.4%   | 1.2% |
|                           |         | 45-59  | 4.6%                      | 1.7%  | 1.0%   | 0.2% | 6.5%                      | 5.9%  | 6.5%   | 1.5% | 6.6%                    | 10.2% | 9.0%   | 1.8% |
|                           |         | 30-44  | 0.4%                      | 0.3%  | 0.2%   | 0.1% | 1.5%                      | 2.9%  | 2.1%   | 1.2% | 2.4%                    | 1.8%  | 1.8%   | 1.8% |
|                           |         | 15-29  | 0.0%                      | 0.0%  | 0.1%   | 0.1% | 0.2%                      | 0.5%  | 1.5%   | 0.9% | 0.6%                    | 1.2%  | 2.4%   | 1.2% |
| <b>Beijing</b>            |         | 105+   | 8.7%                      | 1.5%  | 0.3%   | 0.1% | 0%                        | 3.4%  | 0%     | 0%   | -                       | -     | -      | -    |
| Participants              | 1563    | 90-104 | 19.1%                     | 1.3%  | 1.2%   | 0.2% | 6.8%                      | 3.4%  | 3.4%   | 3.4% | -                       | -     | -      | -    |
| Total deaths              | 59      | 75-89  | 35.9%                     | 3.3%  | 1.7%   | 0.3% | 18.6%                     | 3.4%  | 5.1%   | 1.7% | -                       | -     | -      | -    |
| CVD deaths                | -       | 60-74  | 16.8%                     | 2.7%  | 1.1%   | 0.3% | 22.0%                     | 11.9% | 5.1%   | 1.7% | -                       | -     | -      | -    |
|                           |         | 45-59  | 4.1%                      | 0.6%  | 0.4%   | -    | 5.1%                      | 3.4%  | 0%     | -    | -                       | -     | -      | -    |
|                           |         | 30-44  | 0.2%                      | 0.1%  | 0.1%   | 0.1% | 0%                        | 0%    | 1.7%   | 0%   | -                       | -     | -      | -    |
|                           |         | 15-29  | -                         | -     | -      | -    | -                         | -     | -      | -    | -                       | -     | -      | -    |
| <b>CHS</b>                |         | 105+   | 6.6%                      | 3.7%  | 1.7%   | 0.2% | 4.1%                      | 2.8%  | 2.4%   | 0.3% | 3.2%                    | 1.8%  | 2.5%   | 0.2% |
| Participants              | 3218    | 90-104 | 6.5%                      | 3.1%  | 1.6%   | 0.1% | 5.3%                      | 3.5%  | 1.8%   | 0.1% | 3.9%                    | 2.7%  | 2.2%   | 0.4% |
| Total deaths              | 1476    | 75-89  | 21.4%                     | 8.9%  | 4.7%   | 0.4% | 16.2%                     | 7.5%  | 6.2%   | 0.5% | 12.9%                   | 8.1%  | 6.8%   | 0.9% |
| CVD deaths                | 557     | 60-74  | 12.4%                     | 6.5%  | 3.2%   | 0.6% | 10.0%                     | 8.1%  | 5.1%   | 0.8% | 9.2%                    | 8.4%  | 6.5%   | 0.9% |
|                           |         | 45-59  | 6.4%                      | 3.9%  | 2.8%   | 0.3% | 5.9%                      | 5.2%  | 5.0%   | 0.7% | 6.1%                    | 5.4%  | 6.8%   | 1.1% |
|                           |         | 30-44  | 1.0%                      | 1.3%  | 1.2%   | 0.6% | 1.4%                      | 2.2%  | 2.2%   | 1.4% | 1.3%                    | 2.5%  | 2.2%   | 2.2% |
|                           |         | 15-29  | 0.1%                      | 0.1%  | 0.2%   | 0.4% | 0.2%                      | 0.1%  | 0.4%   | 0.7% | 0.4%                    | 0.4%  | 0.7%   | 0.5% |
| <b>COBRA</b>              |         | 105+   | 42.2%                     | 8.1%  | 2.7%   | 0.4% | 21.2%                     | 7.7%  | 4.8%   | 0%   | 9.5%                    | 9.5%  | 7.4%   | 0%   |
| Participants              | 2866    | 90-104 | 18.7%                     | 2.6%  | 1.5%   | 0.4% | 11.5%                     | 5.3%  | 2.4%   | 1.9% | 11.6%                   | 8.4%  | 1.1%   | 2.1% |
| Total deaths              | 208     | 75-89  | 10.6%                     | 2.3%  | 1.3%   | 0.0% | 11.5%                     | 3.4%  | 2.4%   | 0%   | 14.7%                   | 3.2%  | 4.2%   | 0%   |
| CVD deaths                | 95      | 60-74  | 3.6%                      | 1.1%  | 1.1%   | 0.3% | 6.7%                      | 1.4%  | 4.3%   | 1.4% | 7.4%                    | 2.1%  | 2.1%   | 2.1% |
|                           |         | 45-59  | 0.8%                      | 0.4%  | 0.3%   | 0.5% | 1.9%                      | 1.4%  | 0.5%   | 1.9% | 4.2%                    | 2.1%  | 0%     | 1.1% |
|                           |         | 30-44  | 0.1%                      | 0.1%  | 0.2%   | 0.3% | 0.5%                      | 0.5%  | 1.4%   | 1.9% | 0%                      | 1.1%  | 1.1%   | 1.1% |
|                           |         | 15-29  | 0.1%                      | -     | 0.1%   | 0.1% | 1.4%                      | -     | 1.0%   | 1.4% | 3.2%                    | -     | 1.1%   | 0%   |
| <b>Framingham</b>         |         | 105+   | 10.6%                     | 4.6%  | 1.6%   | 0.1% | 5.0%                      | 4.7%  | 1.7%   | 0%   | 4.3%                    | 4.3%  | 2.2%   | 0%   |
| Participants              | 2954    | 90-104 | 14.6%                     | 4.7%  | 1.8%   | 0.2% | 8.0%                      | 5.3%  | 2.7%   | 1.0% | 7.5%                    | 6.5%  | 4.3%   | 3.2% |

|                        |       |        |       |       |      |      |       |       |       |      |       |       |       |      |
|------------------------|-------|--------|-------|-------|------|------|-------|-------|-------|------|-------|-------|-------|------|
| Total deaths           | 300   | 75-89  | 21.1% | 7.7%  | 2.9% | 0.2% | 13.0% | 8.3%  | 4.3%  | 0.3% | 9.7%  | 5.4%  | 4.3%  | 0%   |
| CVD deaths             | 93    | 60-74  | 13.2% | 5.2%  | 2.5% | 0.2% | 10.3% | 7.0%  | 5.7%  | 0.7% | 9.7%  | 8.6%  | 7.5%  | 2.2% |
|                        |       | 45-59  | 3.6%  | 2.2%  | 1.4% | 0.4% | 6.0%  | 5.7%  | 4.3%  | 0.7% | 3.2%  | 0%    | 5.4%  | 2.2% |
|                        |       | 30-44  | 0.4%  | 0.2%  | 0.4% | 0.1% | 1.0%  | 0%    | 2.3%  | 0.3% | 1.1%  | 0%    | 6.5%  | 0%   |
|                        |       | 15-29  | -     | 0.0%  | 0.1% | 0.1% | -     | 0.3%  | 0.7%  | 0.7% | -     | 1.1%  | 0%    | 1.1% |
|                        |       | 105+   | 1.5%  | 0.9%  | 0.1% | 0.1% | 5.0%  | 3.4%  | 0%    | 0.8% | -     | -     | -     | -    |
| <b>Gubbio</b>          |       | 90-104 | 7.4%  | 4.6%  | 0.2% | 0.1% | 7.6%  | 5.9%  | 0%    | 0.8% | -     | -     | -     | -    |
| Participants           | 1684  | 75-89  | 24.7% | 13.7% | 1.4% | 0.1% | 19.3% | 16.8% | 2.5%  | 0%   | -     | -     | -     | -    |
| Total deaths           | 119   | 60-74  | 21.1% | 17.3% | 1.9% | 0.2% | 14.3% | 18.5% | 0.8%  | 0.8% | -     | -     | -     | -    |
| CVD deaths             | -     | 45-59  | 2.4%  | 2.3%  | 0.2% | 0.1% | 2.5%  | 0.8%  | 0%    | 0%   | -     | -     | -     | -    |
|                        |       | 30-44  | -     | -     | -    | -    | -     | -     | -     | -    | -     | -     | -     | -    |
|                        |       | 15-29  | -     | -     | -    | -    | -     | -     | -     | -    | -     | -     | -     | -    |
|                        |       | 105+   | 10.8% | 3.5%  | 0.9% | 0.1% | 2.6%  | 2.2%  | 1.3%  | 0.2% | 2.1%  | 1.9%  | 0.8%  | 0.2% |
| <b>HUNT</b>            |       | 90-104 | 14.5% | 4.8%  | 1.6% | 0.2% | 6.3%  | 5.0%  | 2.2%  | 0.7% | 6.5%  | 4.3%  | 1.9%  | 0.5% |
| Participants           | 9525  | 75-89  | 19.0% | 7.4%  | 2.6% | 0.2% | 10.4% | 8.7%  | 4.5%  | 0.5% | 9.0%  | 9.3%  | 3.4%  | 0.6% |
| Total deaths           | 1916  | 60-74  | 13.3% | 5.8%  | 2.9% | 0.5% | 11.1% | 9.7%  | 6.0%  | 1.5% | 11.2% | 9.8%  | 6.0%  | 1.5% |
| CVD deaths             | 981   | 45-59  | 4.3%  | 2.6%  | 1.6% | 0.4% | 6.1%  | 6.5%  | 4.6%  | 1.6% | 6.5%  | 6.6%  | 5.5%  | 2.0% |
|                        |       | 30-44  | 1.0%  | 0.6%  | 0.6% | 0.4% | 2.3%  | 1.5%  | 2.0%  | 1.2% | 3.1%  | 1.3%  | 2.2%  | 1.6% |
|                        |       | 15-29  | 0.1%  | 0.1%  | 0.2% | 0.1% | 0.2%  | 0.2%  | 0.6%  | 0.4% | 0.1%  | 0.1%  | 1.1%  | 0.6% |
|                        |       | 105+   | 5.9%  | 2.3%  | 1.1% | 0.2% | 4.5%  | 3.6%  | 3.2%  | 0.9% | -     | -     | -     | -    |
| <b>MESA</b>            |       | 90-104 | 14.5% | 3.5%  | 1.4% | 0.2% | 7.2%  | 2.3%  | 1.8%  | 0.9% | -     | -     | -     | -    |
| Participants           | 6727  | 75-89  | 26.2% | 5.9%  | 2.2% | 0.3% | 19.5% | 6.3%  | 7.7%  | 0.9% | -     | -     | -     | -    |
| Total deaths           | 221   | 60-74  | 20.3% | 4.6%  | 1.9% | 0.2% | 15.4% | 4.5%  | 4.5%  | 0.5% | -     | -     | -     | -    |
| CVD deaths             | -     | 45-59  | 5.1%  | 1.4%  | 1.2% | 0.2% | 3.2%  | 3.6%  | 3.6%  | 0%   | -     | -     | -     | -    |
|                        |       | 30-44  | 0.5%  | 0.3%  | 0.3% | 0.1% | 0.5%  | 0%    | 2.3%  | 1.4% | -     | -     | -     | -    |
|                        |       | 15-29  | 0.0%  | 0.1%  | 0.1% | 0.2% | 0%    | 0.5%  | 0%    | 1.4% | -     | -     | -     | -    |
|                        |       | 105+   | 32.8% | 8.2%  | 3.4% | 0.4% | 9.2%  | 6.5%  | 3.6%  | 0.9% | 5.4%  | 4.5%  | 3.5%  | 0.6% |
| <b>NHANES III</b>      |       | 90-104 | 17.4% | 3.9%  | 1.8% | 0.3% | 7.6%  | 5.1%  | 2.7%  | 0.6% | 5.6%  | 4.7%  | 2.5%  | 0.7% |
| Participants           | 15842 | 75-89  | 11.8% | 3.4%  | 1.9% | 0.3% | 9.7%  | 7.1%  | 4.7%  | 1.2% | 9.2%  | 7.6%  | 5.7%  | 1.5% |
| Total deaths           | 2112  | 60-74  | 5.3%  | 2.1%  | 1.2% | 0.3% | 7.1%  | 5.0%  | 4.3%  | 1.5% | 7.9%  | 4.8%  | 5.1%  | 1.5% |
| CVD deaths             | 909   | 45-59  | 1.6%  | 1.1%  | 0.9% | 0.3% | 5.0%  | 4.4%  | 4.5%  | 1.5% | 5.1%  | 6.1%  | 5.6%  | 2.1% |
|                        |       | 30-44  | 0.3%  | 0.3%  | 0.4% | 0.2% | 1.4%  | 1.5%  | 2.3%  | 1.2% | 1.7%  | 2.0%  | 3.0%  | 1.5% |
|                        |       | 15-29  | 0.0%  | 0.0%  | 0.1% | 0.1% | 0.3%  | 0.2%  | 0.3%  | 0.8% | 0.6%  | 0.2%  | 0.3%  | 1.0% |
|                        |       | 105+   | 3.2%  | 1.2%  | 0.5% | 0.0% | 1.1%  | 1.1%  | 0.9%  | 0%   | 0%    | 1.5%  | 0%    | 0%   |
| <b>PREVEND</b>         |       | 90-104 | 13.4% | 4.2%  | 1.6% | 0.1% | 4.1%  | 5.0%  | 2.1%  | 0%   | 2.3%  | 3.8%  | 0%    | 0%   |
| Participants           | 8367  | 75-89  | 28.0% | 9.3%  | 3.4% | 0.3% | 13.5% | 11.0% | 7.8%  | 0.7% | 9.9%  | 11.5% | 4.6%  | 2.3% |
| Total deaths           | 436   | 60-74  | 18.5% | 7.1%  | 3.1% | 0.3% | 13.1% | 10.8% | 11.0% | 1.1% | 11.5% | 13.7% | 15.3% | 2.3% |
| CVD deaths             | 131   | 45-59  | 2.5%  | 1.3%  | 1.1% | 0.3% | 3.4%  | 3.2%  | 4.1%  | 1.8% | 3.8%  | 4.6%  | 6.1%  | 4.6% |
|                        |       | 30-44  | 0.1%  | 0.1%  | 0.3% | 0.1% | 0%    | 0.9%  | 1.6%  | 0.9% | 0%    | 0%    | 2.3%  | 0%   |
|                        |       | 15-29  | -     | 0.0%  | 0.0% | 0.0% | -     | 0%    | 0.2%  | 0.2% | -     | 0%    | 0%    | 0%   |
|                        |       | 105+   | 2.4%  | 3.2%  | 1.0% | 0.1% | 1.7%  | 2.2%  | 1.9%  | 0.2% | 1.7%  | 1.7%  | 1.7%  | 0%   |
| <b>Rancho Bernardo</b> |       | 90-104 | 5.6%  | 6.6%  | 0.7% | 0.2% | 3.2%  | 3.6%  | 1.4%  | 0.2% | 3.4%  | 2.6%  | 1.7%  | 0%   |
| Participants           | 1759  | 75-89  | 13.4% | 12.1% | 3.1% | 0.2% | 10.4% | 11.9% | 3.1%  | 0.2% | 6.9%  | 10.7% | 3.0%  | 0%   |
| Total deaths           | 587   | 60-74  | 15.3% | 14.8% | 4.4% | 0.5% | 13.1% | 15.7% | 6.5%  | 0.9% | 12.4% | 16.7% | 7.7%  | 2.1% |
| CVD deaths             | 233   | 45-59  | 5.2%  | 4.9%  | 2.8% | 0.5% | 5.1%  | 6.3%  | 4.8%  | 1.4% | 5.2%  | 9.0%  | 5.6%  | 1.3% |
|                        |       | 30-44  | 0.5%  | 1.0%  | 1.1% | 0.2% | 1.0%  | 1.4%  | 2.7%  | 0.5% | 1.7%  | 1.3%  | 2.6%  | 0%   |
|                        |       | 15-29  | -     | 0.2%  | 0.1% | 0.1% | -     | 0.5%  | 0.3%  | 0%   | -     | 0%    | 0.9%  | 0%   |
|                        |       | 105+   | 10.0% | 4.5%  | 2.2% | 0.3% | 4.6%  | 2.9%  | 3.1%  | 0.4% | -     | -     | -     | -    |
| <b>REGARDS</b>         |       | 90-104 | 14.0% | 4.8%  | 2.1% | 0.3% | 7.2%  | 4.1%  | 2.6%  | 0.5% | -     | -     | -     | -    |
| Participants           | 27458 | 75-89  | 20.6% | 6.2%  | 2.8% | 0.4% | 9.8%  | 6.3%  | 3.8%  | 0.8% | -     | -     | -     | -    |
| Total deaths           | 1194  |        |       |       |      |      |       |       |       |      |       |       |       |      |

|              |      |        |       |       |      |      |       |       |      |      |       |       |      |      |
|--------------|------|--------|-------|-------|------|------|-------|-------|------|------|-------|-------|------|------|
| CVD deaths   | -    | 60-74  | 13.1% | 4.9%  | 2.4% | 0.5% | 10.2% | 6.5%  | 5.1% | 1.8% | -     | -     | -    | -    |
|              |      | 45-59  | 3.7%  | 1.9%  | 1.5% | 0.5% | 5.4%  | 4.5%  | 5.2% | 2.3% | -     | -     | -    | -    |
|              |      | 30-44  | 0.8%  | 0.6%  | 0.8% | 0.4% | 1.3%  | 1.6%  | 3.8% | 2.2% | -     | -     | -    | -    |
|              |      | 15-29  | 0.1%  | 0.1%  | 0.2% | 0.4% | 0.3%  | 0.5%  | 1.3% | 1.8% | -     | -     | -    | -    |
| <b>ULSAM</b> |      | 105+   | 0.6%  | 0.2%  | 0.2% | -    | 0.6%  | 0%    | 0.2% | -    | 0%    | 0%    | 0%   | -    |
| Participants | 1120 | 90-104 | 5.2%  | 2.1%  | 1.5% | 0.4% | 4.3%  | 2.1%  | 2.4% | 0.4% | 3.4%  | 3.4%  | 2.4% | 0%   |
| Total deaths | 467  | 75-89  | 25.5% | 9.2%  | 4.1% | 0.6% | 23.8% | 8.1%  | 4.7% | 0.9% | 21.6% | 8.2%  | 3.4% | 1.4% |
| CVD deaths   | 208  | 60-74  | 25.0% | 10.2% | 6.0% | 0.7% | 20.1% | 11.6% | 7.3% | 0.9% | 15.9% | 13.9% | 7.7% | 1.4% |
|              |      | 45-59  | 4.5%  | 1.5%  | 1.8% | 0.3% | 5.4%  | 2.6%  | 3.4% | 0.6% | 5.8%  | 3.4%  | 6.3% | 0.5% |
|              |      | 30-44  | 0.1%  | -     | 0.2% | 0.1% | 0%    | -     | 0.2% | 0%   | 0%    | -     | 0.5% | 0%   |
|              |      | 15-29  | -     | -     | -    | 0.2% | -     | -     | -    | 0.4% | -     | -     | -    | 1.0% |

\*Participants with eGFR <15 were excluded.

- Indicates no record in the cell; 0%, no events in the cell; 0.0%, >0% and <0.05%.

**Web Table 2. Distribution of participants\* and outcomes according to 28 categories of eGFR and dipstick across studies.**

| Study                     | Total N | eGFR   | % Participants |      |      |      | % Total deaths |      |      |      | % CVD deaths |      |      |      |
|---------------------------|---------|--------|----------------|------|------|------|----------------|------|------|------|--------------|------|------|------|
|                           |         |        | Dipstick       |      |      |      | Dipstick       |      |      |      | Dipstick     |      |      |      |
|                           |         |        | -              | ±    | +    | ≥++  | -              | ±    | +    | ≥++  | -            | ±    | +    | ≥++  |
| <b>Overall</b>            |         | 105+   | 8.4%           | 0.5% | 0.2% | 0.1% | 4.0%           | 0.6% | 0.6% | 0.3% | 1.5%         | 0.4% | 0.2% | 0.1% |
| Participants              | 1126774 | 90-104 | 18.8%          | 0.9% | 0.4% | 0.1% | 8.3%           | 0.9% | 0.6% | 0.3% | 6.8%         | 1.2% | 0.3% | 0.2% |
| Total deaths              | 27893   | 75-89  | 34.1%          | 1.6% | 0.7% | 0.2% | 18.4%          | 2.2% | 1.2% | 0.7% | 17.0%        | 3.3% | 1.1% | 0.5% |
| CVD deaths                | 3001    | 60-74  | 24.0%          | 1.2% | 0.6% | 0.2% | 22.8%          | 3.0% | 2.0% | 1.1% | 26.0%        | 3.9% | 1.7% | 0.8% |
|                           |         | 45-59  | 5.5%           | 0.4% | 0.3% | 0.2% | 14.4%          | 2.4% | 2.0% | 1.5% | 17.7%        | 3.4% | 1.8% | 1.4% |
|                           |         | 30-44  | 0.8%           | 0.1% | 0.1% | 0.1% | 5.3%           | 1.1% | 1.4% | 1.4% | 4.9%         | 1.5% | 1.0% | 0.9% |
|                           |         | 15-29  | 0.1%           | 0.0% | 0.0% | 0.1% | 1.5%           | 0.4% | 0.6% | 1.1% | 0.8%         | 0.4% | 0.3% | 1.0% |
| <b>Individual studies</b> |         |        |                |      |      |      |                |      |      |      |              |      |      |      |
| <b>AKDN</b>               |         | 105+   | 7.3%           | 0.4% | 0.3% | 0.1% | 4.5%           | 0.7% | 0.9% | 0.3% | -            | -    | -    | -    |
| Participants              | 690445  | 90-104 | 17.0%          | 0.7% | 0.5% | 0.2% | 7.6%           | 0.8% | 0.8% | 0.4% | -            | -    | -    | -    |
| Total deaths              | 14536   | 75-89  | 33.6%          | 1.3% | 0.8% | 0.3% | 15.0%          | 1.7% | 1.6% | 0.8% | -            | -    | -    | -    |
| CVD deaths                | -       | 60-74  | 26.3%          | 1.0% | 0.7% | 0.3% | 20.3%          | 2.3% | 2.5% | 1.3% | -            | -    | -    | -    |
|                           |         | 45-59  | 6.5%           | 0.4% | 0.3% | 0.2% | 15.1%          | 1.9% | 2.7% | 1.8% | -            | -    | -    | -    |
|                           |         | 30-44  | 1.0%           | 0.1% | 0.1% | 0.1% | 7.3%           | 1.2% | 1.9% | 1.8% | -            | -    | -    | -    |
|                           |         | 15-29  | 0.2%           | 0.0% | 0.1% | 0.1% | 2.3%           | 0.4% | 0.9% | 1.3% | -            | -    | -    | -    |
| <b>AusDiab DIP</b>        |         | 105+   | 4.1%           | 0.4% | 0.3% | 0.1% | 2.3%           | 0.3% | 0.5% | 0.3% | 1.3%         | 0%   | 0.6% | 0%   |
| Participants              | 11151   | 90-104 | 13.2%          | 1.3% | 0.9% | 0.3% | 5.8%           | 0.6% | 0.5% | 0.3% | 2.5%         | 1.3% | 0%   | 0.6% |
| Total deaths              | 653     | 75-89  | 32.9%          | 3.5% | 2.2% | 0.5% | 18.4%          | 3.2% | 2.6% | 0.8% | 11.9%        | 5.0% | 3.8% | 0%   |
| CVD deaths                | 160     | 60-74  | 26.6%          | 2.8% | 1.8% | 0.5% | 24.0%          | 5.2% | 3.4% | 1.2% | 23.1%        | 5.6% | 2.5% | 1.3% |
|                           |         | 45-59  | 5.6%           | 0.7% | 0.7% | 0.3% | 10.9%          | 2.6% | 4.3% | 2.1% | 15.6%        | 2.5% | 6.3% | 2.5% |
|                           |         | 30-44  | 0.6%           | 0.1% | 0.2% | 0.1% | 4.0%           | 0.8% | 1.7% | 1.2% | 4.4%         | 1.3% | 0.6% | 1.9% |
|                           |         | 15-29  | 0.1%           | 0.0% | 0.0% | 0.1% | 0.9%           | 0.3% | 0.6% | 1.2% | 1.9%         | 0%   | 1.9% | 1.9% |
| <b>Beaver Dam</b>         |         | 105+   | 4.6%           | 0.5% | 0.1% | 0.1% | 4.0%           | 0.6% | 0.2% | 0.4% | 2.1%         | 0.7% | 0.3% | 0.3% |
| Participants              | 4919    | 90-104 | 13.2%          | 1.1% | 0.3% | 0.1% | 10.0%          | 1.4% | 0.4% | 0.1% | 8.8%         | 1.7% | 0.3% | 0.1% |
| Total deaths              | 1569    | 75-89  | 30.7%          | 2.2% | 0.6% | 0.3% | 21.7%          | 2.5% | 0.8% | 0.6% | 18.9%        | 2.7% | 1.3% | 0.7% |
| CVD deaths                | 708     | 60-74  | 25.4%          | 2.5% | 0.9% | 0.2% | 22.6%          | 3.6% | 1.6% | 0.4% | 22.9%        | 3.4% | 0.7% | 0.6% |
|                           |         | 45-59  | 10.8%          | 1.2% | 0.4% | 0.4% | 15.3%          | 2.2% | 1.0% | 1.1% | 16.7%        | 2.8% | 1.3% | 1.0% |
|                           |         | 30-44  | 2.7%           | 0.5% | 0.2% | 0.2% | 5.4%           | 1.1% | 0.6% | 0.6% | 7.6%         | 1.6% | 1.0% | 0.7% |
|                           |         | 15-29  | 0.4%           | 0.1% | 0.1% | 0.1% | 1.1%           | 0.3% | 0.3% | 0.2% | 1.3%         | 0.6% | 0%   | 0.1% |
| <b>ESTHER</b>             |         | 105+   | 16.6%          | 1.2% | 2.1% | 0.4% | 12.4%          | 3.0% | 5.3% | 0.6% | -            | -    | -    | -    |
| Participants              | 9351    | 90-104 | 14.2%          | 0.8% | 1.6% | 0.4% | 11.2%          | 0.6% | 4.7% | 1.8% | -            | -    | -    | -    |
| Total deaths              | 169     | 75-89  | 22.1%          | 0.9% | 2.0% | 0.6% | 16.6%          | 1.2% | 3.6% | 3.0% | -            | -    | -    | -    |
| CVD deaths                | -       | 60-74  | 17.1%          | 0.6% | 1.7% | 0.5% | 14.2%          | 0%   | 3.0% | 1.8% | -            | -    | -    | -    |
|                           |         | 45-59  | 9.9%           | 0.6% | 1.2% | 0.3% | 4.7%           | 0%   | 1.8% | 1.2% | -            | -    | -    | -    |
|                           |         | 30-44  | 4.0%           | 0.2% | 0.5% | 0.4% | 5.3%           | 0%   | 1.8% | 1.2% | -            | -    | -    | -    |
|                           |         | 15-29  | 0.2%           | 0.0% | 0.0% | 0.1% | 0.6%           | 0%   | 0%   | 0.6% | -            | -    | -    | -    |
| <b>MRC Older People</b>   | **      | 105+   | 0.5%           | 0.0% | 0.0% | 0.0% | 0.6%           | 0.0% | 0.0% | 0.0% | 0.4%         | 0%   | 0%   | 0%   |
| Participants              | 12142   | 90-104 | 1.8%           | 0.1% | 0.0% | 0.0% | 1.5%           | 0.1% | 0.0% | 0.0% | 1.3%         | 0.1% | 0.0% | 0.0% |
| Total deaths              | 6911    | 75-89  | 9.3%           | 0.3% | 0.3% | 0.3% | 8.5%           | 0.3% | 0.3% | 0.3% | 7.4%         | 0.2% | 0.2% | 0.2% |
| CVD deaths                | 2928    | 60-74  | 30.0%          | 1.5% | 0.7% | 0.7% | 27.4%          | 1.5% | 0.7% | 0.7% | 26.1%        | 1.5% | 0.5% | 0.5% |
|                           |         | 45-59  | 35.8%          | 1.8% | 0.9% | 0.9% | 34.8%          | 1.9% | 1.1% | 1.1% | 35.9%        | 1.9% | 1.2% | 1.2% |
|                           |         | 30-44  | 13.3%          | 0.8% | 0.6% | 0.6% | 15.8%          | 1.1% | 0.9% | 0.9% | 17.0%        | 1.0% | 1.1% | 1.1% |
|                           |         | 15-29  | 2.0%           | 0.2% | 0.2% | 0.2% | 2.8%           | 0.3% | 0.3% | 0.3% | 3.4%         | 0.3% | 0.3% | 0.4% |
| <b>Ohasama</b>            |         | 105+   | 4.8%           | 0.3% | 0.2% | -    | 3.5%           | 0%   | 0%   | -    | 1.6%         | 0%   | 0%   | -    |
| Participants              | 1466    | 90-104 | 16.4%          | 0.5% | 0.8% | 0.2% | 10.4%          | 0%   | 0%   | 0%   | 11.5%        | 0%   | 0%   | 0%   |
| Total deaths              | 201     | 75-89  | 38.7%          | 2.6% | 1.8% | 0.3% | 29.9%          | 3.0% | 3.0% | 0.5% | 23.0%        | 3.3% | 0%   | 0%   |

|                  |        |        |       |      |      |      |       |      |      |      |       |      |       |      |
|------------------|--------|--------|-------|------|------|------|-------|------|------|------|-------|------|-------|------|
| CVD deaths       | 61     | 60-74  | 21.1% | 1.9% | 2.0% | 0.4% | 22.4% | 3.0% | 6.5% | 1.0% | 18.0% | 4.9% | 13.1% | 3.3% |
|                  |        | 45-59  | 5.4%  | 0.5% | 1.2% | 0.2% | 9.5%  | 1.5% | 2.5% | 1.0% | 14.8% | 1.6% | 1.6%  | 1.6% |
|                  |        | 30-44  | 0.3%  | -    | 0.1% | -    | 1.0%  | -    | 0.5% | -    | 0%    | -    | 0%    | -    |
|                  |        | 15-29  | -     | -    | -    | 0.1% | -     | -    | -    | 1.0% | -     | -    | -     | 1.6% |
| <b>Severance</b> |        | 105+   | 9.7%  | 0.9% | 0.5% | 0.1% | 8.9%  | 1.4% | 1.2% | 0.3% | 6.7%  | 0.8% | 1.3%  | 0%   |
| Participants     | 42623  | 90-104 | 18.9% | 1.5% | 0.8% | 0.2% | 16.0% | 1.6% | 1.1% | 0.2% | 14.2% | 2.5% | 1.3%  | 0%   |
| Total deaths     | 1286   | 75-89  | 30.5% | 2.3% | 1.2% | 0.3% | 24.8% | 2.7% | 2.0% | 0.9% | 20.9% | 2.9% | 3.3%  | 1.3% |
| CVD deaths       | 239    | 60-74  | 24.8% | 1.9% | 1.1% | 0.4% | 21.8% | 2.3% | 1.9% | 1.1% | 21.3% | 1.7% | 3.8%  | 2.1% |
|                  |        | 45-59  | 3.9%  | 0.3% | 0.2% | 0.2% | 7.5%  | 0.7% | 1.0% | 0.9% | 10.5% | 1.3% | 0.8%  | 0.4% |
|                  |        | 30-44  | 0.1%  | 0.0% | 0.0% | 0.1% | 0.4%  | 0.2% | 0.4% | 0.5% | 1.3%  | 0.4% | 0.4%  | 0.4% |
|                  |        | 15-29  | 0.0%  | 0.0% | 0.0% | 0.0% | 0%    | 0.1% | 0%   | 0.3% | 0%    | 0%   | 0%    | 0.4% |
| <b>Taiwan</b>    |        | 105+   | 10.4% | 0.5% | 0.1% | 0.0% | 2.5%  | 0.3% | 0.1% | 0.1% | 1.4%  | 0.3% | 0.1%  | 0.1% |
| Participants     | 366819 | 90-104 | 22.5% | 1.2% | 0.1% | 0.1% | 8.2%  | 0.9% | 0.2% | 0.2% | 5.3%  | 0.9% | 0.2%  | 0.2% |
| Total deaths     | 9479   | 75-89  | 35.7% | 2.2% | 0.2% | 0.1% | 21.9% | 2.9% | 0.5% | 0.5% | 15.9% | 3.4% | 0.5%  | 0.4% |
| CVD deaths       | 1848   | 60-74  | 19.8% | 1.6% | 0.2% | 0.1% | 26.8% | 4.0% | 1.0% | 0.7% | 28.1% | 4.2% | 1.3%  | 0.5% |
|                  |        | 45-59  | 3.7%  | 0.5% | 0.1% | 0.1% | 14.8% | 3.4% | 1.2% | 1.3% | 19.2% | 4.1% | 1.7%  | 1.5% |
|                  |        | 30-44  | 0.3%  | 0.1% | 0.1% | 0.1% | 3.0%  | 1.2% | 0.8% | 1.0% | 4.5%  | 1.7% | 1.1%  | 0.9% |
|                  |        | 15-29  | 0.0%  | 0.0% | 0.0% | 0.0% | 0.6%  | 0.4% | 0.4% | 0.9% | 0.7%  | 0.4% | 0.4%  | 1.2% |

\* Participants with eGFR <15 were excluded.

\*\* MRC Older People is not added to overall, since dipstick - and ± were combined in this study.

- Indicates no record in the cell; 0%, no events in the cell; 0.0%, >0% and <0.05%.

**Web Table 3: Statistical significance for interaction between eGFR splines and age (continuous) in the models adjusted for covariates including log ACR for all-cause and cardiovascular mortality.**

|                         | N       | All-cause mortality |                         | Cardiovascular mortality |                         |
|-------------------------|---------|---------------------|-------------------------|--------------------------|-------------------------|
|                         |         | Cases               | P-value for interaction | Cases                    | P-value for interaction |
| <b>ACR studies</b>      |         |                     |                         |                          |                         |
| ARIC                    | 11,408  | 1,235               | 0.226                   | 443                      | 0.662                   |
| AusDiab                 | 11,244  | 667                 | 0.081                   | 166                      | 0.452                   |
| Beijing                 | 1,563   | 59                  | NA*                     | -                        | -                       |
| CHS                     | 3,230   | 1,487               | 0.650                   | 562                      | 0.114                   |
| COBRA                   | 2,872   | 212                 | 0.212                   | 95                       | 0.114                   |
| Framingham              | 2,956   | 301                 | 0.078                   | 93                       | 0.008                   |
| Gubbio                  | 1,684   | 119                 | 0.865                   | -                        | -                       |
| HUNT                    | 9,525   | 1,916               | 0.968                   | 981                      | 0.911                   |
| MESA                    | 6,705   | 222                 | 0.625                   | -                        | -                       |
| NHANES III              | 15,853  | 2,119               | <0.001                  | 910                      | 0.189                   |
| PREVEND                 | 8,370   | 438                 | 0.532                   | 132                      | 0.002                   |
| Rancho Bernardo         | 1,759   | 587                 | 0.710                   | 233                      | 0.395                   |
| REGARDS                 | 27,583  | 1,380               | 0.151                   | -                        | -                       |
| ULSAM                   | 1,120   | 467                 | 0.728                   | 208                      | 0.833                   |
| <b>Dipstick studies</b> |         |                     |                         |                          |                         |
| AKDN                    | 690,680 | 14,628              | <0.001                  | -                        | -                       |
| AusDiab DIP             | 11,244  | 667                 | 0.035                   | 166                      | 0.453                   |
| Beaver Dam              | 4,926   | 1,576               | 0.174                   | 709                      | 0.423                   |
| ESTHER                  | 9,350   | 171                 | 0.151                   | -                        | -                       |
| MRC Older People        | 12,158  | 6,927               | <0.001                  | 2,936                    | 0.196                   |
| Ohasama                 | 1,466   | 201                 | 0.356                   | 61                       | NA*                     |
| Severance               | 42,637  | 1,291               | 0.622                   | 239                      | 0.087                   |
| Taiwan                  | 367,093 | 9,581               | <0.001                  | 1,869                    | <0.001                  |

\* Model did not converge.



**Web Table 4: Statistical significance for interaction between eGFR splines and albuminuria (ordinal) in the models adjusted for covariates for all-cause and cardiovascular mortality.**

|                         | N       | All-cause mortality |                         | Cardiovascular mortality |                         |
|-------------------------|---------|---------------------|-------------------------|--------------------------|-------------------------|
|                         |         | Cases               | P-value for interaction | Cases                    | P-value for interaction |
| <b>ACR studies</b>      |         |                     |                         |                          |                         |
| ARIC                    | 11,408  | 1,235               | 0.690                   | 443                      | 0.236                   |
| AusDiab                 | 11,244  | 667                 | 0.079                   | 166                      | 0.098                   |
| Beijing                 | 1,563   | 59                  | 0.486                   | -                        | -                       |
| CHS                     | 3,230   | 1,487               | 0.688                   | 562                      | 0.593                   |
| COBRA                   | 2,872   | 212                 | 0.706                   | 95                       | 0.252                   |
| Framingham              | 2,956   | 301                 | 0.974                   | 93                       | 0.942                   |
| Gubbio                  | 1,684   | 119                 | 0.255                   | -                        | -                       |
| HUNT                    | 9,525   | 1,916               | 0.417                   | 981                      | 0.223                   |
| MESA                    | 6,705   | 222                 | 0.465                   | -                        | -                       |
| NHANES III              | 15,853  | 2,119               | 0.034                   | 910                      | 0.056                   |
| PREVEND                 | 8,370   | 438                 | 0.962                   | 132                      | 0.050                   |
| Rancho Bernardo         | 1,759   | 587                 | 0.516                   | 233                      | 0.771                   |
| REGARDS                 | 27,583  | 1,380               | 0.837                   | -                        | -                       |
| ULSAM                   | 1,120   | 467                 | 0.042                   | 208                      | 0.105                   |
| <b>Dipstick studies</b> |         |                     |                         |                          |                         |
| AKDN                    | 690,680 | 14,628              | <0.001                  | -                        | -                       |
| AusDiab DIP             | 11,244  | 667                 | 0.870                   | 166                      | 0.896                   |
| Beaver Dam              | 4,926   | 1,576               | 0.787                   | 709                      | 0.340                   |
| ESTHER                  | 9,350   | 171                 | 0.400                   | -                        | -                       |
| MRC Older People        | 12,158  | 6,927               | 0.597                   | 2,936                    | 0.528                   |
| Ohasama                 | 1,466   | 201                 | 0.434                   | 61                       | NA*                     |
| Severance               | 42,637  | 1,291               | 0.515                   | 239                      | 0.273                   |
| Taiwan                  | 367,093 | 9,581               | <0.001                  | 1,869                    | 0.409                   |

\* Model did not converge.

**Web Table 5. Pooled estimates of adjusted hazard ratios (95% CI) for all-cause mortality according to categories of eGFR and ACR among participants aged < and ≥65 y.**

| eGFR (ml/min/1.73 m <sup>2</sup> ) | ACR (mg/g) |              |       |               |        |              |       |              |
|------------------------------------|------------|--------------|-------|---------------|--------|--------------|-------|--------------|
|                                    | <10        |              | 10-29 |               | 30-299 |              | ≥300  |              |
|                                    | <65 y      |              |       |               |        |              |       |              |
| ≥105                               | 1.26       | (1.02-1.55)  | 1.72  | (1.39-2.14)   | 2.56   | (2.01-3.26)  | 4.34  | (2.17-8.65)  |
| 90-104                             | reference  |              | 1.62  | (1.27-2.08)   | 1.46   | (1.06-2.02)  | 6.18  | (3.16-12.07) |
| 75-89                              | 0.92       | (0.79-1.08)  | 1.52  | (1.22-1.88)   | 1.88   | (1.44-2.47)  | 2.87  | (1.72-4.80)  |
| 60-74                              | 1.13       | (0.89-1.43)  | 1.43  | (1.11-1.86)   | 2.07   | (1.53-2.80)  | 5.61  | (3.39-9.27)  |
| 45-59                              | 1.86       | (1.40-2.47)  | 3.57  | (2.04-6.26)   | 3.28   | (1.93-5.58)  | 5.85  | (3.51-9.77)  |
| 30-44                              | 2.82       | (1.15-6.95)  | 9.52  | (3.02-30.05)  | 6.05   | (3.48-10.51) | 6.21  | (3.82-10.11) |
| 15-29                              | 28.01      | (8.44-92.90) | 20.13 | (2.70-149.87) | 7.37   | (0.62-88.10) | 11.83 | (5.12-27.30) |
|                                    | ≥65 y      |              |       |               |        |              |       |              |
| ≥105                               | 1.00       | (0.86-1.17)  | 1.39  | (1.13-1.71)   | 2.13   | (1.75-2.59)  | 3.73  | (2.43-5.72)  |
| 90-104                             | reference  |              | 1.38  | (1.19-1.59)   | 1.62   | (1.34-1.96)  | 2.98  | (1.72-5.17)  |
| 75-89                              | 1.02       | (0.91-1.13)  | 1.32  | (1.17-1.49)   | 1.69   | (1.47-1.94)  | 2.61  | (1.89-3.62)  |
| 60-74                              | 0.98       | (0.87-1.09)  | 1.46  | (1.29-1.65)   | 1.90   | (1.61-2.23)  | 2.74  | (2.22-3.40)  |
| 45-59                              | 1.21       | (0.99-1.49)  | 1.80  | (1.56-2.08)   | 2.36   | (1.97-2.84)  | 3.96  | (3.22-4.86)  |
| 30-44                              | 1.90       | (1.55-2.31)  | 2.45  | (2.01-2.99)   | 3.62   | (2.70-4.85)  | 5.77  | (3.99-8.35)  |
| 15-29                              | 5.99       | (2.81-12.78) | 3.49  | (2.16-5.63)   | 4.78   | (3.13-7.31)  | 6.14  | (4.66-8.08)  |

Adjusted for age, race, gender, CVD history, systolic blood pressure, diabetes, smoking, total cholesterol.  
Abbreviations: eGFR: estimated glomerular filtration rate; ACR: urine albumin-to-creatinine ratio; CVD: cardiovascular disease.

**Web Table 6. Pooled estimates of adjusted hazard ratios (95% CI) for cardiovascular mortality according to categories of eGFR and ACR among participants aged < and ≥65 y.**

| eGFR (ml/min/1.73 m <sup>2</sup> ) | ACR (mg/g) |                |       |                |        |               |       |              |
|------------------------------------|------------|----------------|-------|----------------|--------|---------------|-------|--------------|
|                                    | <10        |                | 10-29 |                | 30-299 |               | ≥300  |              |
|                                    | <65 y      |                |       |                |        |               |       |              |
| ≥105                               | 0.97       | (0.67-1.41)    | 1.43  | (0.87-2.34)    | 3.04   | (1.73-5.35)   | 2.27  | (0.78-6.63)  |
| 90-104                             | reference  |                | 2.42  | (1.37-4.26)    | 1.74   | (0.92-3.32)   | 6.54  | (3.20-13.38) |
| 75-89                              | 1.05       | (0.69-1.59)    | 1.82  | (0.90-3.65)    | 2.83   | (1.66-4.81)   | 4.88  | (1.85-12.84) |
| 60-74                              | 1.44       | (1.01-2.05)    | 1.60  | (0.94-2.75)    | 3.56   | (2.12-5.97)   | 8.74  | (4.51-16.96) |
| 45-59                              | 1.34       | (0.56-3.23)    | 8.81  | (4.74-16.40)   | 4.86   | (2.60-9.10)   | 5.00  | (1.45-17.16) |
| 30-44                              | 16.84      | (2.11-134.27)  | 30.57 | (0.36-2593.59) | 4.11   | (1.38-12.24)  | 8.71  | (3.91-19.39) |
| 15-29                              | 97.42      | (19.37-489.92) | 61.62 | (7.50-506.54)  | 20.40  | (2.19-190.38) | 15.27 | (6.81-34.24) |
|                                    | ≥65 y      |                |       |                |        |               |       |              |
| ≥105                               | 0.85       | (0.64-1.14)    | 1.25  | (0.93-1.69)    | 2.25   | (1.60-3.16)   | 2.52  | (1.02-6.23)  |
| 90-104                             | reference  |                | 1.28  | (1.00-1.65)    | 1.81   | (1.23-2.66)   | 4.01  | (2.35-6.84)  |
| 75-89                              | 0.97       | (0.80-1.19)    | 1.36  | (1.10-1.67)    | 1.59   | (1.08-2.34)   | 3.88  | (2.46-6.12)  |
| 60-74                              | 0.97       | (0.80-1.18)    | 1.51  | (1.22-1.88)    | 2.06   | (1.49-2.83)   | 3.39  | (2.23-5.16)  |
| 45-59                              | 1.44       | (1.17-1.78)    | 2.03  | (1.63-2.54)    | 3.06   | (2.12-4.41)   | 4.84  | (3.52-6.65)  |
| 30-44                              | 2.32       | (1.72-3.13)    | 2.76  | (1.55-4.90)    | 4.19   | (2.67-6.60)   | 6.24  | (3.84-10.13) |
| 15-29                              | 19.65      | (6.32-61.11)   | 7.94  | (1.33-47.53)   | 5.37   | (3.44-8.39)   | 9.60  | (4.58-20.13) |

Adjusted for age, race, gender, CVD history, systolic blood pressure, diabetes, smoking, total cholesterol.  
 Abbreviations: eGFR: estimated glomerular filtration rate; ACR: urine albumin-to-creatinine ratio; CVD: cardiovascular disease.

**Web Table 7. Pooled estimates of adjusted hazard ratios (95% CI) for all-cause mortality according to categories of eGFR and dipstick among participants aged < and ≥65 y.**

| eGFR (ml/min/1.73 m <sup>2</sup> ) | Dipstick  |             |      |              |      |              |      |              |
|------------------------------------|-----------|-------------|------|--------------|------|--------------|------|--------------|
|                                    | -         |             | ±    |              | +    |              | ≥++  |              |
|                                    | <65 y     |             |      |              |      |              |      |              |
| ≥105                               | 1.29      | (0.89-1.88) | 2.34 | (1.04-5.25)  | 3.13 | (1.37-7.11)  | 5.18 | (3.43-7.82)  |
| 90-104                             | reference |             | 1.44 | (0.98-2.10)  | 1.82 | (1.16-2.87)  | 2.64 | (1.37-5.09)  |
| 75-89                              | 0.71      | (0.56-0.90) | 1.49 | (1.27-1.75)  | 1.58 | (1.32-1.89)  | 3.09 | (2.51-3.80)  |
| 60-74                              | 0.71      | (0.51-1.00) | 1.34 | (1.19-1.52)  | 1.70 | (1.44-2.01)  | 2.28 | (1.85-2.82)  |
| 45-59                              | 0.90      | (0.64-1.25) | 1.95 | (1.64-2.33)  | 2.13 | (1.70-2.67)  | 3.93 | (2.92-5.28)  |
| 30-44                              | 2.10      | (1.60-2.75) | 2.80 | (2.04-3.85)  | 4.92 | (3.49-6.94)  | 4.82 | (3.81-6.09)  |
| 15-29                              | 6.28      | (4.41-8.94) | 6.68 | (2.96-15.07) | 6.49 | (4.12-10.23) | 7.62 | (5.05-11.50) |
|                                    | ≥65 y     |             |      |              |      |              |      |              |
| ≥105                               | 1.48      | (1.00-2.19) | 2.87 | (1.53-5.37)  | 3.96 | (2.69-5.83)  | 5.58 | (3.79-8.22)  |
| 90-104                             | reference |             | 1.86 | (1.49-2.32)  | 2.30 | (1.26-4.19)  | 2.60 | (1.36-4.96)  |
| 75-89                              | 0.93      | (0.69-1.24) | 1.34 | (1.10-1.63)  | 1.74 | (1.49-2.04)  | 1.88 | (1.52-2.32)  |
| 60-74                              | 0.87      | (0.62-1.23) | 1.18 | (1.04-1.33)  | 1.51 | (1.22-1.86)  | 1.79 | (1.30-2.46)  |
| 45-59                              | 1.01      | (0.68-1.48) | 1.31 | (1.01-1.69)  | 1.53 | (1.35-1.72)  | 2.08 | (1.54-2.80)  |
| 30-44                              | 1.58      | (1.03-2.42) | 1.90 | (1.23-2.96)  | 2.01 | (1.44-2.79)  | 2.58 | (1.76-3.80)  |
| 15-29                              | 2.06      | (1.46-2.91) | 3.33 | (1.72-6.45)  | 2.76 | (1.80-4.25)  | 6.33 | (3.55-11.29) |

Adjusted for age, race, gender, CVD history, systolic blood pressure, diabetes, smoking, total cholesterol.  
Abbreviations: eGFR: estimated glomerular filtration rate; CVD: cardiovascular disease.

**Web Table 8. Pooled estimates of adjusted hazard ratios (95% CI) for cardiovascular mortality according to categories of eGFR and dipstick among participants aged < and ≥65 y.**

| eGFR (ml/min/1.73 m <sup>2</sup> ) | Dipstick  |             |      |             |      |               |       |               |
|------------------------------------|-----------|-------------|------|-------------|------|---------------|-------|---------------|
|                                    | -         |             | ±    |             | +    |               | ≥++   |               |
|                                    | <65 y     |             |      |             |      |               |       |               |
| ≥105                               | 0.95      | (0.68-1.34) | 2.33 | (1.22-4.43) | 6.59 | (0.43-101.15) | 4.12  | (0.94-17.99)  |
| 90-104                             | reference |             | 1.64 | (1.05-2.57) | 1.59 | (0.74-3.44)   | 4.46  | (1.62-12.29)  |
| 75-89                              | 0.79      | (0.64-0.98) | 2.32 | (1.70-3.18) | 1.64 | (0.90-2.97)   | 2.33  | (1.16-4.68)   |
| 60-74                              | 1.00      | (0.81-1.23) | 1.31 | (0.92-1.87) | 2.61 | (1.66-4.09)   | 1.70  | (0.83-3.49)   |
| 45-59                              | 1.28      | (0.89-1.83) | 2.33 | (1.50-3.61) | 2.49 | (1.35-4.59)   | 3.16  | (1.61-6.23)   |
| 30-44                              | 4.02      | (2.22-7.28) | 4.24 | (2.26-7.97) | 4.26 | (1.95-9.29)   | 3.50  | (1.75-7.01)   |
|                                    | ≥65 y     |             |      |             |      |               |       |               |
| ≥105                               | 0.91      | (0.52-1.59) | 1.82 | (0.56-5.92) | 7.22 | (2.57-20.24)  | 14.79 | (1.92-113.78) |
| 90-104                             | reference |             | 2.13 | (1.16-3.91) | 2.92 | (0.40-21.52)  | 2.91  | (0.59-14.41)  |
| 75-89                              | 0.82      | (0.61-1.10) | 1.50 | (0.79-2.86) | 2.39 | (1.36-4.17)   | 2.19  | (0.93-5.19)   |
| 60-74                              | 0.93      | (0.70-1.23) | 1.38 | (0.94-2.03) | 1.34 | (0.66-2.72)   | 2.58  | (1.01-6.60)   |
| 45-59                              | 1.30      | (0.98-1.74) | 1.77 | (1.20-2.61) | 2.47 | (1.56-3.92)   | 2.52  | (1.49-4.27)   |
| 30-44                              | 2.05      | (1.47-2.86) | 2.56 | (1.60-4.10) | 2.35 | (1.38-3.99)   | 3.13  | (1.73-5.66)   |
| 15-29                              | 2.98      | (1.27-7.03) | 3.36 | (1.48-7.63) | 7.26 | (0.65-81.65)  | 14.49 | (3.63-57.79)  |

Adjusted for age, race, gender, CVD history, systolic blood pressure, diabetes, smoking, total cholesterol.

Abbreviations: eGFR: estimated glomerular filtration rate; CVD: cardiovascular disease.

**Web Table 9. HRs for all-cause mortality according to eGFR splines in the model adjusted for covariates including log-ACR.**

|                             | eGFR        |                   |             |                   |             |                   |             |                   |             |                   |            |             |                   |             |                   |
|-----------------------------|-------------|-------------------|-------------|-------------------|-------------|-------------------|-------------|-------------------|-------------|-------------------|------------|-------------|-------------------|-------------|-------------------|
|                             | 15          |                   | 45          |                   | 60          |                   | 75          |                   | 90          |                   | 95         | 105         |                   | 120         |                   |
|                             | HR          | 95% CI            |            | HR          | 95% CI            | HR          | 95% CI            |
| ARIC                        | 2.51        | 1.63, 3.86        | 1.95        | 1.49, 2.56        | 1.00        | 0.82, 1.23        | 0.89        | 0.73, 1.08        | 0.97        | 0.89, 1.06        | REF        | 1.05        | 0.89, 1.25        | 1.26        | 1.07, 1.47        |
| AusDiab                     | 4.67        | 2.53, 8.63        | 1.08        | 0.76, 1.54        | 0.99        | 0.75, 1.31        | 0.91        | 0.67, 1.24        | 1.04        | 0.86, 1.26        | REF        | 0.93        | 0.63, 1.36        | 1.76        | 1.10, 2.81        |
| Beijing                     | 0.45        | 0.00, 1456        | 1.06        | 0.22, 5.21        | 1.91        | 0.82, 4.45        | 0.95        | 0.39, 2.31        | 1.00        | 0.60, 1.67        | REF        | 1.00        | 0.36, 2.74        | 0.67        | 0.18, 2.56        |
| CHS                         | 2.33        | 1.59, 3.41        | 1.82        | 1.47, 2.25        | 1.26        | 1.06, 1.50        | 1.11        | 0.93, 1.32        | 1.00        | 0.92, 1.08        | REF        | 1.01        | 0.86, 1.17        | 1.11        | 0.95, 1.30        |
| COBRA                       | 10.45       | 5.04, 21.67       | 1.26        | 0.58, 2.73        | 1.39        | 0.70, 2.73        | 1.38        | 0.79, 2.43        | 1.00        | 0.83, 1.20        | REF        | 1.01        | 0.69, 1.46        | 1.09        | 0.77, 1.54        |
| Framingham                  | 3.88        | 1.45, 10.41       | 1.15        | 0.66, 2.03        | 1.18        | 0.81, 1.72        | 0.75        | 0.49, 1.14        | 1.06        | 0.89, 1.26        | REF        | 0.90        | 0.63, 1.27        | 0.91        | 0.67, 1.24        |
| Gubbio                      | 0.11        | 0.00, 5.88        | 0.11        | 0.00, 5.88        | 1.01        | 0.50, 2.04        | 0.65        | 0.36, 1.17        | 0.92        | 0.69, 1.23        | REF        | 1.19        | 0.66, 2.13        | 2.62        | 1.35, 5.09        |
| HUNT                        | 2.04        | 1.28, 3.24        | 1.58        | 1.30, 1.92        | 1.35        | 1.16, 1.58        | 0.90        | 0.77, 1.06        | 1.07        | 0.99, 1.17        | REF        | 0.87        | 0.74, 1.03        | 1.02        | 0.86, 1.22        |
| MESA                        | 3.46        | 1.22, 9.81        | 0.77        | 0.36, 1.63        | 0.83        | 0.52, 1.32        | 0.91        | 0.58, 1.42        | 0.89        | 0.74, 1.07        | REF        | 1.26        | 0.88, 1.82        | 1.46        | 1.02, 2.09        |
| NHANES III                  | 2.68        | 1.81, 3.97        | 1.83        | 1.51, 2.21        | 1.31        | 1.12, 1.54        | 1.03        | 0.87, 1.21        | 1.01        | 0.95, 1.08        | REF        | 0.97        | 0.86, 1.10        | 1.12        | 1.01, 1.25        |
| PREVEND                     | 2.07        | 0.74, 5.81        | 1.08        | 0.64, 1.83        | 0.92        | 0.66, 1.29        | 1.05        | 0.76, 1.45        | 0.91        | 0.75, 1.10        | REF        | 1.22        | 0.83, 1.80        | 1.19        | 0.73, 1.96        |
| Rancho Bernardo             | 1.80        | 0.68, 4.75        | 1.65        | 1.14, 2.40        | 0.90        | 0.68, 1.18        | 1.16        | 0.86, 1.56        | 1.01        | 0.87, 1.18        | REF        | 0.98        | 0.72, 1.33        | 1.12        | 0.85, 1.47        |
| REGARDS                     | 4.24        | 3.10, 5.80        | 1.79        | 1.42, 2.26        | 1.65        | 1.35, 2.01        | 1.00        | 0.80, 1.26        | 1.06        | 0.96, 1.17        | REF        | 0.89        | 0.73, 1.08        | 1.05        | 0.88, 1.24        |
| ULSAM                       | 13.31       | 1.13, 156         | 1.46        | 0.76, 2.79        | 1.25        | 0.88, 1.79        | 0.88        | 0.62, 1.24        | 1.17        | 0.88, 1.56        | REF        | 0.73        | 0.41, 1.28        | 0.72        | 0.38, 1.37        |
| <b>Pooled</b>               | <b>3.14</b> | <b>2.39, 4.13</b> | <b>1.57</b> | <b>1.39, 1.78</b> | <b>1.18</b> | <b>1.05, 1.32</b> | <b>0.98</b> | <b>0.91, 1.05</b> | <b>1.01</b> | <b>0.98, 1.05</b> | <b>REF</b> | <b>0.97</b> | <b>0.92, 1.04</b> | <b>1.13</b> | <b>1.04, 1.23</b> |
| Heterogeneity $\chi^2$ (df) | 29.22 (13)  |                   | 20.11 (13)  |                   | 28.95 (13)  |                   | 11.12 (13)  |                   | 8.65 (13)   |                   | REF        | 8.65 (13)   |                   | 19.77 (13)  |                   |
| p-value                     | 0.006       |                   | 0.092       |                   | 0.007       |                   | 0.601       |                   | 0.799       |                   | REF        | 0.799       |                   | 0.101       |                   |
| $I^2$                       | 56%         |                   | 35%         |                   | 55%         |                   | 0%          |                   | 0%          |                   | REF        | 0%          |                   | 34%         |                   |

**Web Table 10. HRs for cardiovascular mortality according to eGFR splines in the model adjusted for covariates including log-ACR.**

|                             | eGFR        |                   |             |                   |             |                   |             |                   |             |                   |            |             |                   |             |                   |
|-----------------------------|-------------|-------------------|-------------|-------------------|-------------|-------------------|-------------|-------------------|-------------|-------------------|------------|-------------|-------------------|-------------|-------------------|
|                             | 15          |                   | 45          |                   | 60          |                   | 75          |                   | 90          |                   | 95         | 105         |                   | 120         |                   |
|                             | HR          | 95% CI            | REF        | HR          | 95% CI            | HR          | 95% CI            |
| ARIC                        | 2.37        | 1.34, 4.21        | 2.44        | 1.64, 3.63        | 1.33        | 0.96, 1.83        | 0.80        | 0.57, 1.12        | 1.10        | 0.94, 1.29        | REF        | 0.83        | 0.60, 1.13        | 0.95        | 0.71, 1.27        |
| AusDiab                     | 5.62        | 1.76, 17.92       | 1.70        | 0.84, 3.47        | 1.31        | 0.70, 2.43        | 1.20        | 0.60, 2.43        | 1.28        | 0.75, 2.16        | REF        | 0.62        | 0.21, 1.77        | 1.33        | 0.31, 5.77        |
| CHS                         | 2.63        | 1.50, 4.62        | 2.06        | 1.47, 2.90        | 1.68        | 1.27, 2.23        | 1.15        | 0.85, 1.55        | 1.08        | 0.95, 1.24        | REF        | 0.86        | 0.65, 1.12        | 1.05        | 0.81, 1.36        |
| COBRA                       | 6.26        | 1.57, 24.92       | 1.47        | 0.45, 4.77        | 1.68        | 0.65, 4.35        | 1.23        | 0.55, 2.75        | 1.25        | 0.96, 1.63        | REF        | 0.64        | 0.37, 1.08        | 0.78        | 0.48, 1.26        |
| Framingham                  | 2.55        | 0.49, 13.35       | 0.83        | 0.31, 2.23        | 0.88        | 0.43, 1.77        | 0.74        | 0.34, 1.64        | 0.89        | 0.65, 1.22        | REF        | 1.25        | 0.67, 2.35        | 1.27        | 0.72, 2.24        |
| HUNT                        | 2.83        | 1.60, 5.00        | 1.76        | 1.35, 2.29        | 1.49        | 1.20, 1.84        | 0.84        | 0.67, 1.07        | 1.08        | 0.95, 1.22        | REF        | 0.86        | 0.67, 1.10        | 1.01        | 0.78, 1.31        |
| NHANES III                  | 2.04        | 1.12, 3.72        | 2.20        | 1.69, 2.87        | 1.27        | 1.01, 1.60        | 1.08        | 0.85, 1.38        | 1.07        | 0.97, 1.18        | REF        | 0.87        | 0.72, 1.07        | 0.94        | 0.79, 1.13        |
| PREVEND                     | 1.30        | 0.13, 12.67       | 1.73        | 0.70, 4.29        | 1.56        | 0.82, 2.95        | 1.41        | 0.73, 2.72        | 1.20        | 0.76, 1.90        | REF        | 0.69        | 0.28, 1.74        | 0.93        | 0.39, 2.23        |
| Rancho Bernardo             | 1.23        | 0.26, 5.87        | 2.00        | 1.12, 3.59        | 1.13        | 0.72, 1.78        | 1.52        | 0.92, 2.49        | 0.89        | 0.68, 1.17        | REF        | 1.26        | 0.73, 2.16        | 1.42        | 0.87, 2.30        |
| ULSAM                       | 29.20       | 2.38, 359         | 2.45        | 1.04, 5.79        | 1.58        | 0.88, 2.86        | 0.88        | 0.49, 1.56        | 1.42        | 0.82, 2.45        | REF        | 0.50        | 0.17, 1.48        | NA*         | NA*, NA*          |
| <b>Pooled</b>               | <b>2.66</b> | <b>2.04, 3.46</b> | <b>1.99</b> | <b>1.73, 2.28</b> | <b>1.40</b> | <b>1.25, 1.57</b> | <b>1.01</b> | <b>0.88, 1.15</b> | <b>1.08</b> | <b>1.02, 1.14</b> | <b>REF</b> | <b>0.86</b> | <b>0.77, 0.96</b> | <b>1.00</b> | <b>0.90, 1.11</b> |
| heterogeneity $\chi^2$ (df) | 8.84 (9)    |                   | 6.22 (9)    |                   | 5.73 (9)    |                   | 9.94 (9)    |                   | 6.14 (9)    |                   | REF        | 6.14 (9)    |                   | 4.51 (8)    |                   |
| p-value                     | 0.452       |                   | 0.718       |                   | 0.767       |                   | 0.355       |                   | 0.726       |                   | REF        | 0.726       |                   | 0.808       |                   |
| $I^2$                       | 0%          |                   | 0%          |                   | 0%          |                   | 9%          |                   | 0%          |                   | REF        | 0%          |                   | 0%          |                   |

\* Unreliable estimates.

**Web Table 11. HRs for all-cause mortality according to eGFR splines in the model adjusted for covariates including dipstick.**

|                             | eGFR        |                   |             |                   |             |                   |             |                   |             |                   |            |             |                   |             |                   |
|-----------------------------|-------------|-------------------|-------------|-------------------|-------------|-------------------|-------------|-------------------|-------------|-------------------|------------|-------------|-------------------|-------------|-------------------|
|                             | 15          |                   | 45          |                   | 60          |                   | 75          |                   | 90          |                   | 95         | 105         |                   | 120         |                   |
|                             | HR          | 95% CI            | REF        | HR          | 95% CI            | HR          | 95% CI            |
| AKDN                        | 1.83        | 1.65, 2.03        | 0.72        | 0.67, 0.77        | 0.50        | 0.47, 0.53        | 0.51        | 0.48, 0.55        | 0.76        | 0.74, 0.79        | REF        | 1.73        | 1.62, 1.85        | 2.41        | 2.27, 2.56        |
| AusDiab DIP                 | 7.26        | 3.90, 13.52       | 1.05        | 0.73, 1.51        | 0.95        | 0.72, 1.26        | 0.90        | 0.66, 1.22        | 1.01        | 0.83, 1.22        | REF        | 0.98        | 0.67, 1.44        | 1.85        | 1.16, 2.96        |
| Beaver Dam                  | 3.30        | 2.15, 5.06        | 1.31        | 1.06, 1.62        | 0.96        | 0.81, 1.14        | 0.85        | 0.71, 1.03        | 0.95        | 0.86, 1.05        | REF        | 1.10        | 0.90, 1.34        | 1.68        | 1.39, 2.03        |
| ESTHER                      | 5.29        | 1.96, 14.29       | 0.57        | 0.29, 1.12        | 0.93        | 0.53, 1.65        | 0.59        | 0.33, 1.05        | 1.04        | 0.85, 1.27        | REF        | 0.93        | 0.62, 1.40        | 0.80        | 0.55, 1.17        |
| MRC Older People            | 2.64        | 2.17, 3.22        | 0.98        | 0.86, 1.12        | 0.88        | 0.78, 1.00        | 0.83        | 0.72, 0.97        | 0.83        | 0.75, 0.93        | REF        | 1.45        | 1.17, 1.79        | 1.43        | 1.16, 1.77        |
| Ohasama                     | 16.47       | 1.62, 168         | 2.13        | 0.87, 5.22        | 1.77        | 1.07, 2.91        | 1.00        | 0.63, 1.57        | 1.05        | 0.81, 1.35        | REF        | 0.91        | 0.55, 1.51        | 1.32        | 0.61, 2.87        |
| Severance                   | 3.52        | 1.81, 6.82        | 1.62        | 1.10, 2.37        | 0.90        | 0.74, 1.09        | 0.77        | 0.65, 0.92        | 0.97        | 0.90, 1.05        | REF        | 1.05        | 0.90, 1.23        | 1.21        | 1.04, 1.41        |
| Taiwan                      | 3.72        | 3.23, 4.28        | 1.61        | 1.46, 1.76        | 0.97        | 0.90, 1.04        | 0.90        | 0.83, 0.97        | 0.95        | 0.91, 0.99        | REF        | 1.11        | 1.02, 1.20        | 1.22        | 1.12, 1.34        |
| <b>Pooled</b>               | <b>3.44</b> | <b>2.42, 4.89</b> | <b>1.13</b> | <b>0.82, 1.57</b> | <b>0.91</b> | <b>0.68, 1.21</b> | <b>0.78</b> | <b>0.62, 0.98</b> | <b>0.93</b> | <b>0.83, 1.03</b> | <b>REF</b> | <b>1.16</b> | <b>0.94, 1.44</b> | <b>1.44</b> | <b>1.06, 1.95</b> |
| heterogeneity $\chi^2$ (df) | 82.98 (7)   |                   | 204.69 (7)  |                   | 253.32 (7)  |                   | 141.91 (7)  |                   | 101.24 (7)  |                   | REF        | 101.24 (7)  |                   | 217.77 (7)  |                   |
| p-value                     | <0.001      |                   | <0.001      |                   | <0.001      |                   | <0.001      |                   | <0.001      |                   | REF        | <0.001      |                   | <0.001      |                   |
| $I^2$                       | 92%         |                   | 97%         |                   | 97%         |                   | 95%         |                   | 93%         |                   | REF        | 93%         |                   | 97%         |                   |



**Web Table 12. HRs for cardiovascular mortality according to eGFR splines in the model adjusted for covariates including dipstick.**

|                             | eGFR        |                   |             |                   |             |                   |             |                   |             |                   |            |             |                   |             |                   |
|-----------------------------|-------------|-------------------|-------------|-------------------|-------------|-------------------|-------------|-------------------|-------------|-------------------|------------|-------------|-------------------|-------------|-------------------|
|                             | 15          |                   | 45          |                   | 60          |                   | 75          |                   | 90          |                   | 95         | 105         |                   | 120         |                   |
|                             | HR          | 95% CI            |            | HR          | 95% CI            | HR          | 95% CI            |
| AusDiab DIP                 | 10.46       | 3.25, 33.68       | 1.85        | 0.90, 3.80        | 1.28        | 0.68, 2.41        | 1.28        | 0.63, 2.61        | 1.22        | 0.72, 2.08        | REF        | 0.67        | 0.23, 1.94        | 1.42        | 0.33, 6.17        |
| Beaver Dam                  | 2.88        | 1.57, 5.30        | 1.61        | 1.18, 2.19        | 1.03        | 0.80, 1.34        | 0.86        | 0.64, 1.14        | 0.96        | 0.81, 1.13        | REF        | 1.09        | 0.79, 1.51        | 1.33        | 0.93, 1.89        |
| MRC Older People            | 3.30        | 2.43, 4.48        | 1.26        | 1.01, 1.56        | 1.04        | 0.84, 1.29        | 0.87        | 0.68, 1.12        | 0.87        | 0.72, 1.05        | REF        | 1.32        | 0.91, 1.91        | 1.27        | 0.87, 1.84        |
| Ohasama                     | 13.07       | 0.31, 546         | 3.34        | 0.70, 15.99       | 2.97        | 1.07, 8.21        | 1.55        | 0.58, 4.15        | 1.70        | 0.83, 3.48        | REF        | 0.35        | 0.08, 1.45        | 2.62        | 0.88, 7.80        |
| Severance                   | 1.67        | 0.24, 11.85       | 1.29        | 0.58, 2.87        | 1.08        | 0.71, 1.63        | 0.71        | 0.47, 1.08        | 1.08        | 0.90, 1.31        | REF        | 0.86        | 0.59, 1.25        | 1.12        | 0.79, 1.60        |
| Taiwan                      | 4.38        | 3.19, 5.99        | 2.08        | 1.69, 2.57        | 1.30        | 1.09, 1.54        | 0.96        | 0.80, 1.16        | 0.93        | 0.83, 1.04        | REF        | 1.15        | 0.92, 1.44        | 1.29        | 1.02, 1.64        |
| <b>Pooled</b>               | <b>3.86</b> | <b>2.90, 5.12</b> | <b>1.64</b> | <b>1.27, 2.10</b> | <b>1.16</b> | <b>1.00, 1.34</b> | <b>0.91</b> | <b>0.80, 1.03</b> | <b>0.97</b> | <b>0.89, 1.06</b> | <b>REF</b> | <b>1.07</b> | <b>0.90, 1.28</b> | <b>1.28</b> | <b>1.10, 1.49</b> |
| heterogeneity $\chi^2$ (df) | 6.36 (5)    |                   | 11.87 (5)   |                   | 6.88 (5)    |                   | 3.96 (5)    |                   | 6.03 (5)    |                   | REF        | 6.03 (5)    |                   | 2.23 (5)    |                   |
| p-value                     | 0.272       |                   | 0.037       |                   | 0.23        |                   | 0.555       |                   | 0.303       |                   | REF        | 0.303       |                   | 0.816       |                   |
| $I^2$                       | 21%         |                   | 58%         |                   | 27%         |                   | 0%          |                   | 17%         |                   | REF        | 17%         |                   | 0%          |                   |

**Web Table 13. HRs for all-cause mortality according to ACR splines in the model adjusted for covariates including spline eGFR.**

|                             | ACR         |                   |            |             |                   |             |                   |             |                   |             |                   |
|-----------------------------|-------------|-------------------|------------|-------------|-------------------|-------------|-------------------|-------------|-------------------|-------------|-------------------|
|                             | 2.5         |                   | 5          | 10          |                   | 30          |                   | 300         |                   | 1000        |                   |
|                             | HR          | 95% CI            |            | HR          | 95% CI            |
| ARIC                        | 0.89        | 0.84, 0.94        | REF        | 1.13        | 1.07, 1.19        | 1.46        | 1.17, 1.82        | 2.28        | 1.78, 2.92        | 2.63        | 2.04, 3.38        |
| AusDiab                     | 0.68        | 0.58, 0.81        | REF        | 1.46        | 1.23, 1.74        | 1.65        | 1.29, 2.12        | 2.54        | 1.77, 3.64        | 3.78        | 2.39, 5.96        |
| Beijing                     | 0.68        | 0.50, 0.94        | REF        | 1.47        | 1.06, 2.02        | 1.52        | 0.58, 4.01        | 7.21        | 2.60, 19.98       | 1.11        | 0.03, 41.25       |
| CHS                         | 0.80        | 0.72, 0.89        | REF        | 1.24        | 1.12, 1.38        | 1.66        | 1.41, 1.96        | 2.37        | 1.89, 2.97        | 2.60        | 2.00, 3.37        |
| COBRA                       | 0.87        | 0.67, 1.15        | REF        | 1.14        | 0.87, 1.50        | 1.12        | 0.68, 1.85        | 2.19        | 1.23, 3.92        | 2.87        | 1.67, 4.92        |
| Framingham                  | 0.81        | 0.72, 0.91        | REF        | 1.24        | 1.10, 1.39        | 1.42        | 1.00, 2.02        | 1.39        | 0.80, 2.43        | 1.92        | 1.06, 3.49        |
| Gubbio                      | 0.92        | 0.70, 1.22        | REF        | 1.09        | 0.82, 1.43        | 2.22        | 1.13, 4.35        | 1.52        | 0.27, 8.59        | 4.60        | 1.31, 16.16       |
| HUNT                        | 0.79        | 0.71, 0.87        | REF        | 1.27        | 1.15, 1.42        | 1.94        | 1.68, 2.23        | 1.98        | 1.61, 2.44        | 3.45        | 2.56, 4.63        |
| MESA                        | 1.02        | 0.81, 1.28        | REF        | 0.98        | 0.78, 1.23        | 2.16        | 1.41, 3.31        | 2.85        | 1.63, 4.99        | 6.86        | 3.73, 12.59       |
| NHANES III                  | 0.88        | 0.83, 0.94        | REF        | 1.13        | 1.06, 1.21        | 1.59        | 1.39, 1.81        | 1.93        | 1.61, 2.32        | 2.33        | 1.95, 2.79        |
| PREVEND                     | 0.72        | 0.55, 0.94        | REF        | 1.39        | 1.06, 1.83        | 1.86        | 1.37, 2.53        | 3.67        | 2.40, 5.61        | 3.00        | 1.55, 5.78        |
| Rancho Bernardo             | 0.93        | 0.71, 1.22        | REF        | 1.08        | 0.82, 1.42        | 1.33        | 1.00, 1.77        | 2.59        | 1.64, 4.10        | 2.58        | 1.28, 5.18        |
| REGARDS                     | 0.81        | 0.71, 0.93        | REF        | 1.23        | 1.07, 1.41        | 1.80        | 1.50, 2.15        | 2.08        | 1.66, 2.62        | 2.82        | 2.27, 3.50        |
| ULSAM                       | 0.84        | 0.69, 1.01        | REF        | 1.20        | 0.99, 1.44        | 1.21        | 0.89, 1.65        | 1.56        | 1.01, 2.41        | 1.44        | 0.70, 2.97        |
| <b>Pooled</b>               | <b>0.83</b> | <b>0.80, 0.87</b> | <b>REF</b> | <b>1.20</b> | <b>1.15, 1.26</b> | <b>1.63</b> | <b>1.50, 1.77</b> | <b>2.22</b> | <b>1.97, 2.51</b> | <b>2.81</b> | <b>2.44, 3.23</b> |
| heterogeneity $\chi^2$ (df) | 20.55 (13)  |                   | REF        | 20.55 (13)  |                   | 19.35 (13)  |                   | 21.43 (13)  |                   | 21.78 (13)  |                   |
| p-value                     | 0.082       |                   | REF        | 0.082       |                   | 0.113       |                   | 0.065       |                   | 0.059       |                   |
| $I^2$                       | 37%         |                   | REF        | 37%         |                   | 33%         |                   | 39%         |                   | 40%         |                   |

**Web Table 14. HRs for cardiovascular mortality according to ACR splines in the model adjusted for covariates including spline eGFR.**

|                             | ACR         |                   |            |             |                   |             |                   |             |                   |             |                   |
|-----------------------------|-------------|-------------------|------------|-------------|-------------------|-------------|-------------------|-------------|-------------------|-------------|-------------------|
|                             | 2.5         |                   | 5          | 10          |                   | 30          |                   | 300         |                   | 1000        |                   |
|                             | HR          | 95% CI            |            | HR          | 95% CI            |
| ARIC                        | 0.84        | 0.75, 0.93        | REF        | 1.20        | 1.08, 1.33        | 1.90        | 1.35, 2.67        | 2.93        | 2.04, 4.21        | 3.23        | 2.23, 4.67        |
| AusDiab                     | 0.58        | 0.40, 0.84        | REF        | 1.73        | 1.18, 2.53        | 1.55        | 0.95, 2.52        | 2.23        | 1.13, 4.43        | 2.87        | 1.23, 6.68        |
| CHS                         | 0.73        | 0.61, 0.88        | REF        | 1.37        | 1.14, 1.65        | 1.96        | 1.51, 2.54        | 2.91        | 2.07, 4.09        | 3.15        | 2.14, 4.66        |
| COBRA                       | 0.85        | 0.56, 1.29        | REF        | 1.18        | 0.78, 1.79        | 1.97        | 1.01, 3.82        | 0.52        | 0.17, 1.63        | 1.18        | 0.48, 2.88        |
| Framingham                  | 0.81        | 0.64, 1.02        | REF        | 1.24        | 0.98, 1.57        | 1.38        | 0.71, 2.65        | 3.68        | 1.68, 8.02        | 5.94        | 2.78, 12.72       |
| HUNT                        | 0.69        | 0.59, 0.81        | REF        | 1.44        | 1.24, 1.69        | 1.86        | 1.52, 2.27        | 2.28        | 1.72, 3.02        | 3.20        | 2.14, 4.80        |
| NHANES III                  | 0.86        | 0.78, 0.96        | REF        | 1.16        | 1.04, 1.29        | 1.63        | 1.33, 1.99        | 2.13        | 1.63, 2.77        | 2.17        | 1.66, 2.83        |
| PREVEND                     | 0.81        | 0.47, 1.41        | REF        | 1.24        | 0.71, 2.15        | 2.20        | 1.26, 3.85        | 4.00        | 1.92, 8.35        | 3.55        | 1.19, 10.59       |
| Rancho Bernardo             | 0.85        | 0.53, 1.35        | REF        | 1.18        | 0.74, 1.87        | 1.49        | 0.93, 2.37        | 2.61        | 1.28, 5.35        | 2.38        | 0.71, 8.00        |
| ULSAM                       | 0.71        | 0.52, 0.96        | REF        | 1.41        | 1.04, 1.92        | 1.66        | 1.06, 2.59        | 1.76        | 0.95, 3.26        | 2.08        | 0.85, 5.09        |
| <b>Pooled</b>               | <b>0.79</b> | <b>0.74, 0.85</b> | <b>REF</b> | <b>1.27</b> | <b>1.18, 1.36</b> | <b>1.77</b> | <b>1.60, 1.96</b> | <b>2.43</b> | <b>2.01, 2.94</b> | <b>2.81</b> | <b>2.27, 3.46</b> |
| heterogeneity $\chi^2$ (df) |             | 10.51 (9)         | REF        |             | 10.51 (9)         |             | 3.79 (9)          |             | 14.29 (9)         |             | 12.88 (9)         |
| p-value                     |             | 0.311             | REF        |             | 0.311             |             | 0.925             |             | 0.112             |             | 0.168             |
| $I^2$                       |             | 14%               | REF        |             | 14%               |             | 0%                |             | 37%               |             | 30%               |

**Web Figure 1. HRs for all-cause (A) and cardiovascular (B) mortality according to eGFR with the adjustment for dipstick and covariates. The reference is GFR 95. Dots represent statistically significant and triangles represent not significant.**

**A**

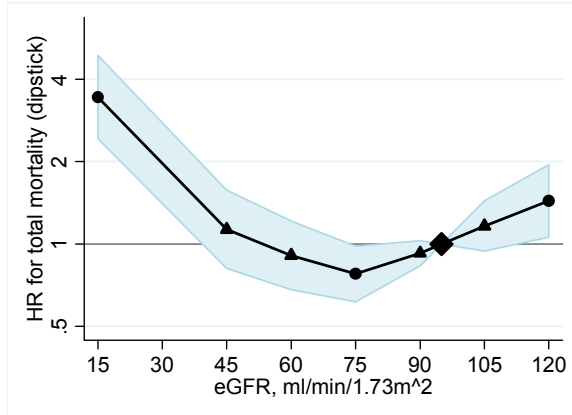

**B**

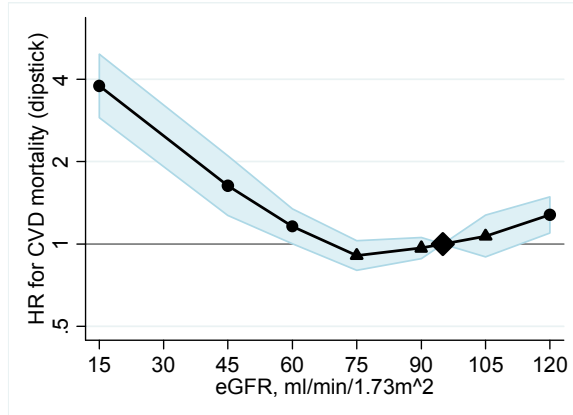

**Web Figure 2. HRs according to eGFR adjusted for covariates including log-ACR for all-cause mortality in participants aged <65 (A) and  $\geq 65$  y (B) and for cardiovascular mortality in participants aged <65 (C) and  $\geq 65$  y (D). The reference is eGFR 95. Dots represent statistically significant and triangles represent not significant.**

**A**

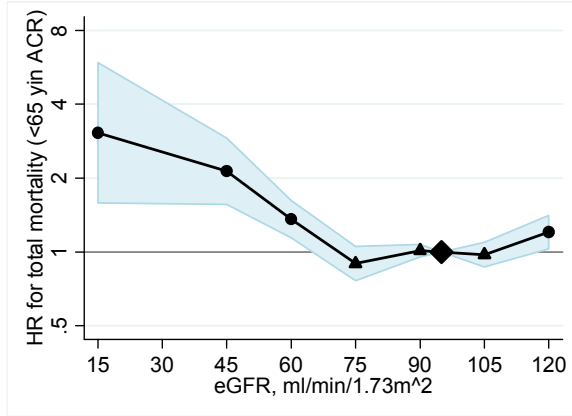

**B**

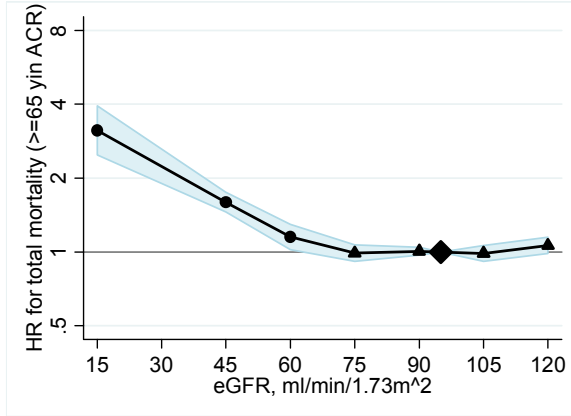

**C**

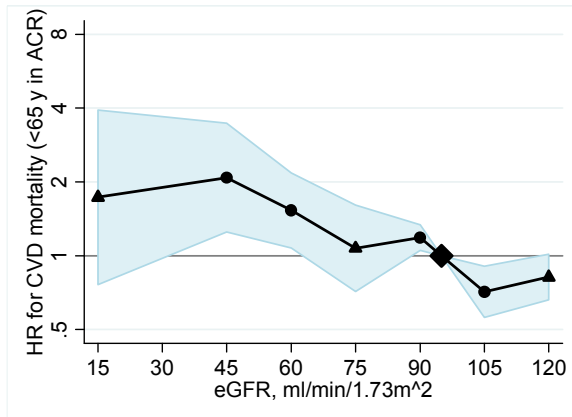

**D**

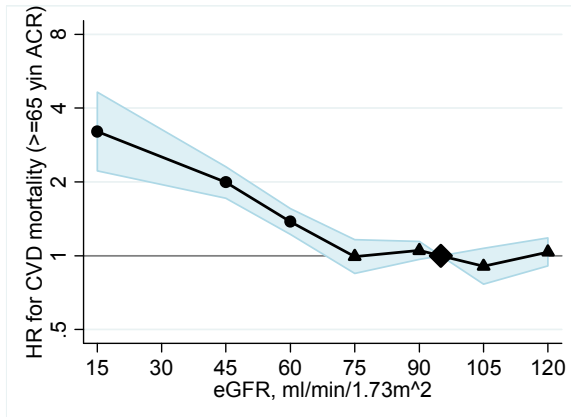

**Web Figure 3. HRs according to eGFR adjusted for covariates including dipstick for all-cause mortality in participants aged <65 (A) and  $\geq 65$  y (B) and for cardiovascular mortality in participants aged <65 (C) and  $\geq 65$  y (D). The reference is eGFR 95. Dots represent statistically significant and triangles represent not significant.**

**A**

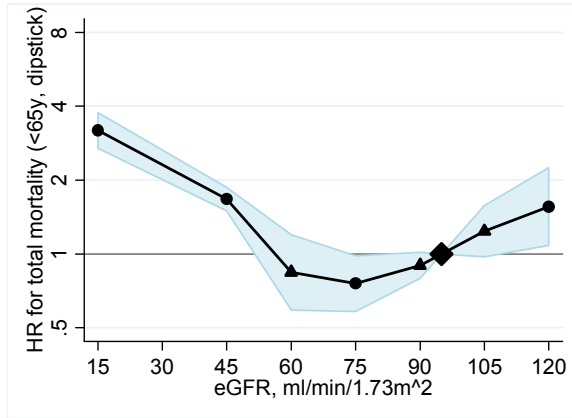

**B**

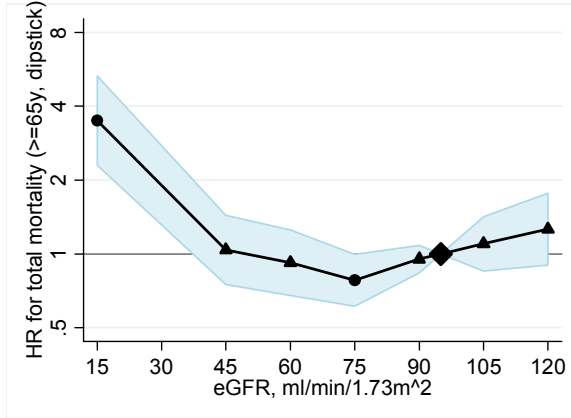

**C**

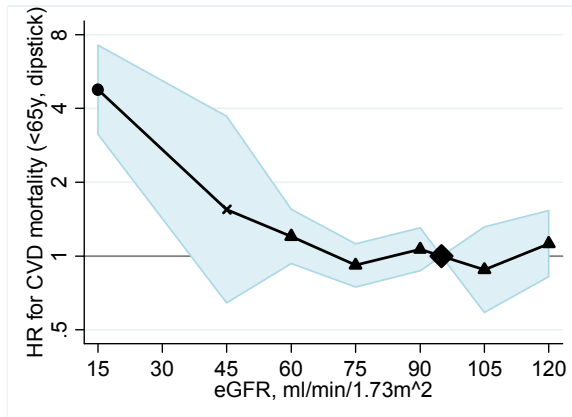

**D**

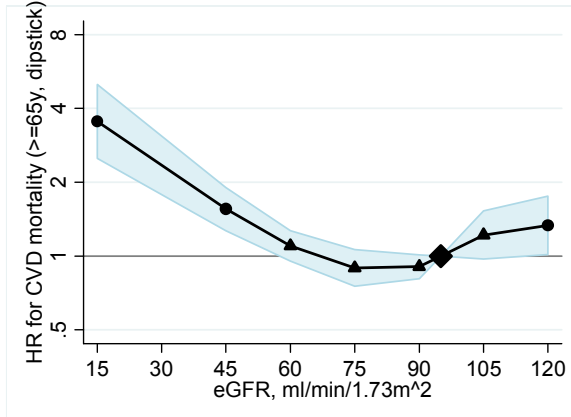

**Web Figure 4. Forest plots of HRs for all-cause mortality at eGFR 45 (vs. 95) ml/min/1.73 m<sup>2</sup> (A) and ACR 30 (vs. 5) mg/g (B) in ACR studies.**

**A**

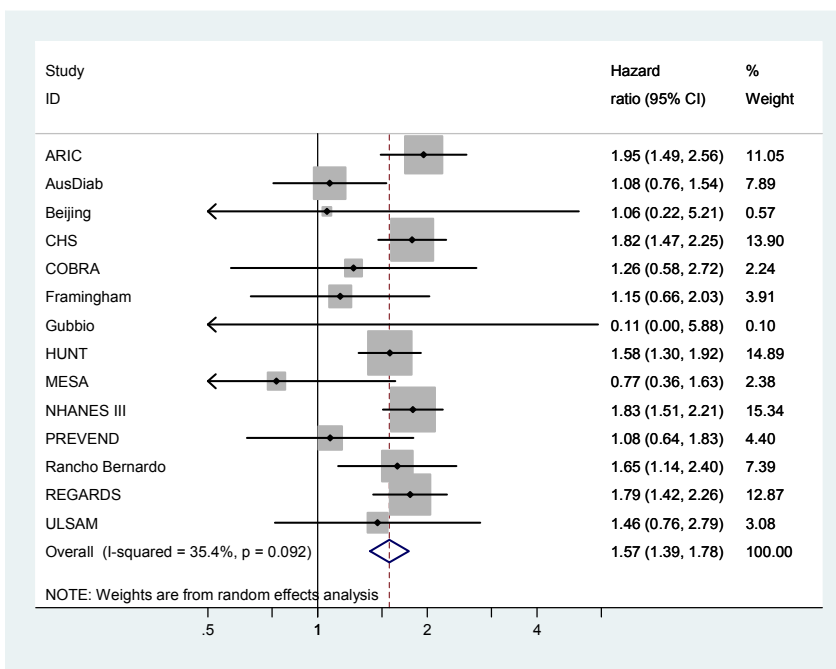

**B**

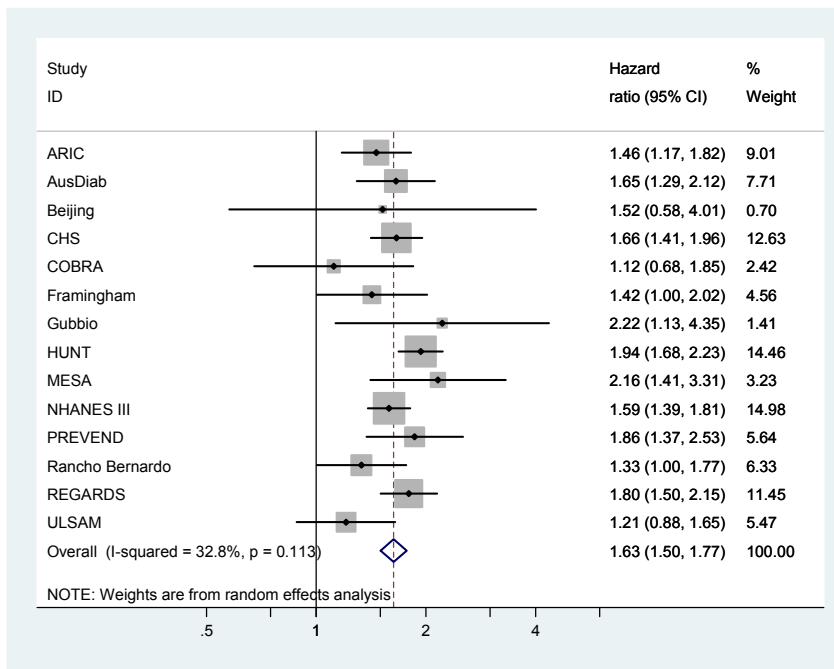

Web Figure 5. Meta-regression of logHR for all-cause mortality at eGFR 45 (vs. 95 ml/min/1.73 m<sup>2</sup>) on % blacks in ACR studies.

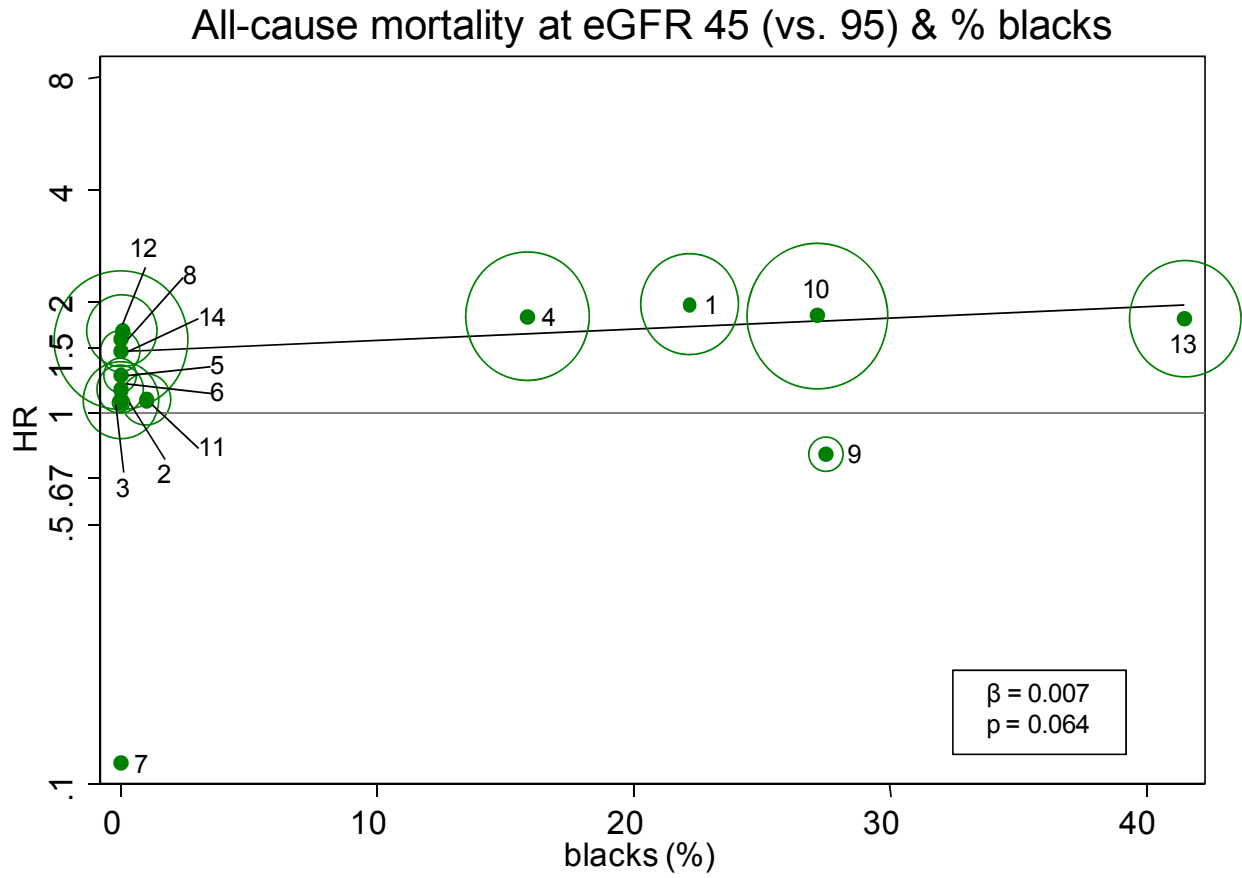

1. ARIC 2. AusDiab 3. Beijing 4. CHS 5. COBRA 6. Framingham 7. Gubbio 8. HUNT 9. MESA  
10. NHANES III 11. PREVEND 12. Rancho Bernardo 13. REGARDS 14. ULSAM



**Web Appendix 1. Acronyms or abbreviations for studies included in the current report and their key references linked to the Web references.**

|                   |                                                                             |
|-------------------|-----------------------------------------------------------------------------|
| ARIC:             | Atherosclerosis Risk in Communities Study <sup>1</sup>                      |
| AusDiab:          | Australian Diabetes, Obesity, and Lifestyle Study <sup>2</sup>              |
| Beijing:          | Beijing Cohort Study <sup>3</sup>                                           |
| CHS:              | Cardiovascular Health Study <sup>4</sup>                                    |
| COBRA:            | COBRA Study <sup>5</sup>                                                    |
| Framingham:       | Framingham Heart Study <sup>6</sup>                                         |
| Gubbio:           | Gubbio Study <sup>7</sup>                                                   |
| HUNT:             | Nord Trøndelag Health Study <sup>8</sup>                                    |
| MESA:             | Multi-Ethnic Study of Atherosclerosis <sup>9</sup>                          |
| NHANES III:       | Third US National Health and Nutrition Examination Survey <sup>10</sup>     |
| PREVEND:          | Prevention of Renal and Vascular End-stage Disease Study <sup>11</sup>      |
| Rancho Bernardo:  | Rancho Bernardo Study <sup>12</sup>                                         |
| REGARDS:          | Reasons for Geographic And Racial Differences in Stroke Study <sup>13</sup> |
| ULSAM:            | Uppsala Longitudinal Study of Adult Men <sup>14</sup>                       |
| AKDN:             | Alberta Kidney Disease Network <sup>15</sup>                                |
| Beaver Dam:       | Beaver Dam CKD Study <sup>16</sup>                                          |
| ESTHER:           | ESTHER Study <sup>17</sup>                                                  |
| MRC Older People: | MRC Study of assessment of older people <sup>18</sup>                       |
| Ohasama:          | Ohasama Study <sup>19</sup>                                                 |
| Severance:        | Severance Cohort Study <sup>20</sup>                                        |
| Taiwan:           | Taiwan MJ Cohort Study <sup>21</sup>                                        |

## Web Appendix 2. Distributed data analysis overview and analytic notes for some of individual studies.

### Overview:

Programs were written in SAS and STATA by the Analytic Team and piloted in several studies (AKDN, ARIC, Framingham, CHS, NHANES III, MESA, and PREVEND) prior to distribution to all participating studies.

The participating studies were asked to prepare a dataset with 12 variables (follow-up time, event variable, and ten predictors including eGFR and albuminuria). To minimize heterogeneity, we circulated guidelines for definitions of variables (e.g. hypertension, diabetes, smoking) and dataset preparation. We instructed studies to use a complete data analysis for the two key risk factors, eGFR and albuminuria. For other variables we allowed for imputation with the mean value of the covariate or more sophisticated methods, but this was not tracked in the meta-analysis. Standard program (in SAS and STATA) were designed to automatically save all output needed for the meta-analysis including categorical/continuous analyses and tests of interaction. The participating studies sent their results to the Analysis Team, who then pooled the estimates across centers using R and STATA.

Studies were instructed to standardize and calibrate their serum creatinine to their best ability and report the method of standardization. The reported creatinine calibration allows grouping studies into studies that reported using an IDMS traceable method or conducted some serum creatinine calibration to IDMS traceable methods (AKDN, ARIC, AusDiab, Beaver Dam, Beijing, CHS, COBRA, Gubbio, Framingham, HUNT, MESA, NHANES III, PREVEND, Rancho Bernardo, REGARDS, Severance) and studies where the creatinine standardization was either not done or not reported to us (ESTHER, MRC Older People, Ohasama, ULSAM, Taiwan). Retrospective assessment of creatinine calibration without direct collection of laboratory data is limited since substantial creatinine calibration differences have been documented even within a single laboratory using the same method over time.

Urine assays were generally conducted on spot urines but timing varied across studies. A few studies had multiple urine measurements and averaged the results in their measure of albuminuria (HUNT three spot urines, PREVEND two 24-hour urines).

The reference range of eGFR (90-104 ml/min/1.73 m<sup>2</sup>) was chosen based on the optimal level of GFR ( $\geq 90$  ml/min/1.73 m<sup>2</sup>) reported in current clinical guidelines<sup>22,23</sup> and the fact that some studies have reported higher mortality risk at high eGFR.<sup>24-26</sup> The reference point of eGFR (95 ml/min/1.73 m<sup>2</sup>) was then arbitrarily chosen within the reference range but not in the knots (90 and 105) used to create splines. The flat risk relationship between eGFR 75 and 104 makes the results quite insensitive to the choice of reference point in this range. eGFR categories were 15 ml/min/1.73m<sup>2</sup> to allow for the possibility that the original categories may need to be split into finer categories. The reference range of ACR (<10 mg/g) was chosen based on the observation that the normal mean value for urine albumin excretion in adults is approximately 10 mg/day.<sup>23</sup> The reference point of ACR (5 mg/g) was then arbitrarily chosen within the reference range at a level thought to be in the optimal range but not in the knot (10 mg/g) used to create the splines.

Interaction models were tested in each cohort, and the coefficients and standard errors were saved. This allowed for a meta-analysis of a combined interaction model. The approach we used does not provide an interaction p-value for the meta-analyzed model.

Following the published results from individual studies, we assumed the proportional hazards model provided the best summary of the data in each study and did not summarize statistics on deviations from proportionality across the covariates.

The points with extremely low HR ( $<0.025$ , usually due to zero cells) or extremely high HR ( $>40$ ) with a wide standard error ( $\geq 0.35$ , corresponding to 2.5 fold higher/lower bounds for 95% CI) and statistically insignificance in each study were not included in the meta-analysis because it was likely that such estimates result from unreliable data such as small numbers of participants or events at the relevant levels of eGFR and/or albuminuria and could unduly influence a random effects meta-analysis.

**Notes for individual studies:**

AusDiab: This study has measured both ACR and dipstick and thus contributed to the analyses for ACR and dipstick.

Beijing: This study used a Chinese-specific equation for estimating GFR.<sup>27</sup>

CHS: This study consists of participants only aged 65 or older and thus did not contribute to the subgroup analysis of younger population.

COBRA: Current smokers in this study include chewable tobacco.

Gubbio: This study consists of participants aged between 45 and 64 and thus did not contribute to the subgroup analysis of older population.

HUNT: This study is a general-population study overall but measured urine albumin mainly in participants with treated hypertension or diabetes. However, this study was included in this report, since they measured albuminuria in a 5% random sample out of  $\approx 65,000$  participants and, thus, the relationship between kidney measures and risk was maintained.

ULSAM: This study measured urinary albumin excretion rate ( $\mu\text{g}/\text{min}$ ), which was converted to  $\text{mg}/\text{day}$  by multiplying 1.44. All participants aged 65 or older and thus this study did not contribute to the subgroup analysis of younger population.

AKDN: Although this study has not collected information on race, the proportion of blacks in the province of Alberta is considered  $<3\%$ .<sup>15</sup> Other variables that were not collected in this study are systolic blood pressure, total cholesterol concentration, and smoking.

ESTHER: This study only measured urine albumin excretion with the minimum detection value of  $11.3 \text{ mg}/\text{L}$  (equivalent to  $\text{ACR } 17 \text{ mg}/\text{g}$ ) and thus its reference proteinuria group ( $\leq 11.3 \text{ mg}/\text{L}$ ) was likely to contain individuals with  $\text{ACR} \geq 10 \text{ mg}/\text{g}$ . Therefore, this study was meta-analyzed with the dipstick studies, translating urine albumin excretion ( $\leq 11.3, 11.4-19.9, 20-199$  and  $\geq 200 \text{ mg}/\text{L}$  to -,  $\pm$ , +, and  $\geq ++$ ).

MRC Older People: This study categorized their dipstick data - and  $\pm$  into the same group and thus could be only included in meta-analyses for models with eGFR as a continuous variable. This study has not collected total cholesterol. This study consists of participants aged  $\geq 65$  years old and thus did not contribute to the subgroup analysis of younger population.

### Web Appendix 3: Statistical models¶ used in the study.

Model 1: eGFR splines† + log<sub>8</sub>ACR

Used in: Figure 2, Web Table 3, Web Table 9, Web Table 10, Web Figure 2

Model 2: eGFR splines† + ACR splines‡

Used in: Figure 2, Web Table 13, Web Table 14

Model 3: eGFR splines† + log<sub>8</sub>ACR + eGFR splines\*age (continuous) interaction terms

Used in: Web Table 3

Model 4: eGFR splines† + ACR as an ordinal variable (1=<30, 2=30-299, 3=≥300 mg/g)

Used in: Web Table 4

Model 5: eGFR splines† + ACR as an ordinal variable (1=<30, 2=30-299, 3=≥300 mg/g) + their interaction terms

Used in: Figure 3, Web Table 4,

Model 6: eGFR splines† + dipstick as an ordinal variable (1=-/±, 2=+, 3=≥++)

Used in: Web Table 3, Web Table 4, Web Table 11, Web Table 12, Web Figure 1, Web Figure 3

Model 7: eGFR splines† + dipstick as an ordinal variable (1=-/±, 2=+, 3=≥++) + eGFR splines\*age (continuous) interaction terms

Used in: Web Table 3

Model 8: eGFR splines† + dipstick as an ordinal variable (1=-/±, 2=+, 3=≥++) + their interaction terms

Used in: Figure 3, Web Table 4

Model 9: 28 categories by eGFR (15-29, 30-44, 45-59, 60-74, 75-89, 90-104, ≥105) and ACR (<10, 10-29, 30-299, ≥300)

Used in: Table 2, Web Table 5, Web Table 6

Model 10: 28 categories by eGFR (same as Model 9) and dipstick (-, ±, +, ≥++)

Used in: Table 3, Web Table 7, Web Table 8

¶ All models include age, gender, race, smoking, CVD history, systolic blood pressure, diabetes, and serum cholesterol as covariates.

† Knots at eGFR 45, 60, 75, 90, 105 ml/min/1.73 m<sup>2</sup>

‡ Knots at ACR 10, 30, 300 mg/g

## Web References

1. Matsushita K, Selvin E, Bash LD, Franceschini N, Astor BC, Coresh J. Change in estimated GFR associates with coronary heart disease and mortality. *J Am Soc Nephrol* 2009; 20:2617-24.
2. White SL, Polkinghorne KR, Atkins RC, Chadban SJ. Comparison of the Prevalence and Mortality Risk of CKD in Australia Using the CKD Epidemiology Collaboration (CKD-EPI) and Modification of Diet in Renal Disease (MDRD) Study GFR Estimating Equations: The AusDiab (Australian Diabetes, Obesity and Lifestyle) Study. *Am J Kidney Dis* 2010; 55:660-70.
3. Zhang L, Zuo L, Xu G, Wang F, Wang M, Wang S, et al. Community-based screening for chronic kidney disease among populations older than 40 years in Beijing. *Nephrol Dial Transplant* 2007; 22:1093-9.
4. Shlipak MG, Katz R, Kestenbaum B, Fried LF, Newman AB, Siscovick DS, et al. Rate of kidney function decline in older adults: a comparison using creatinine and cystatin C. *Am J Nephrol* 2009; 30:171-8.
5. Jafar TH, Qadri Z, Hashmi S. Prevalence of microalbuminuria and associated electrocardiographic abnormalities in an Indo-Asian population. *Nephrol Dial Transplant* 2009; 24:2111-6.
6. Parikh NI, Hwang S-J, Larson MG, Levy D, Fox CS. Chronic Kidney Disease as a Predictor of Cardiovascular Disease (from the Framingham Heart Study). *The American Journal of Cardiology* 2008; 102:47-53.
7. Cirillo M, Lanti MP, Menotti A, Laurenzi M, Mancini M, Zanchetti A, et al. Definition of kidney dysfunction as a cardiovascular risk factor: use of urinary albumin excretion and estimated glomerular filtration rate. *Arch Intern Med* 2008; 168:617-24.
8. Hallan SI, Coresh J, Astor BC, Asberg A, Powe NR, Romundstad S, et al. International comparison of the relationship of chronic kidney disease prevalence and ESRD risk. *J Am Soc Nephrol* 2006; 17:2275-84.
9. Bui AL, Katz R, Kestenbaum B, de Boer IH, Fried LF, Polak JF, et al. Cystatin C and carotid intima-media thickness in asymptomatic adults: the Multi-Ethnic Study of Atherosclerosis (MESA). *Am J Kidney Dis* 2009; 53:389-98.
10. Astor BC, Hallan SI, Miller ER, 3rd, Yeung E, Coresh J. Glomerular filtration rate, albuminuria, and risk of cardiovascular and all-cause mortality in the US population. *Am J Epidemiol* 2008; 167:1226-34.
11. Hillege HL, Fidler V, Diercks GF, van Gilst WH, de Zeeuw D, van Veldhuisen DJ, et al. Urinary albumin excretion predicts cardiovascular and noncardiovascular mortality in general population. *Circulation* 2002; 106:1777-82.
12. Jassal SK, Kritiz-Silverstein D, Barrett-Connor E. A Prospective Study of Albuminuria and Cognitive Function in Older Adults: The Rancho Bernardo Study. *Am J Epidemiol* 2010; 171:277-86.
13. Howard VJ, Cushman M, Pulley L, Gomez CR, Go RC, Prineas RJ, et al. The reasons for geographic and racial differences in stroke study: objectives and design. *Neuroepidemiology* 2005; 25:135-43.
14. Ingelsson E, Sundstrom J, Lind L, Riserus U, Larsson A, Basu S, et al. Low-grade albuminuria and the incidence of heart failure in a community-based cohort of elderly men. *Eur Heart J* 2007; 28:1739-45.
15. Hemmelgarn BR, Manns BJ, Lloyd A, James MT, Klarenbach S, Quinn RR, et al. Relation between kidney function, proteinuria, and adverse outcomes. *JAMA* 2010; 303:423-9.
16. Shankar A, Klein R, Klein BE. The association among smoking, heavy drinking, and chronic kidney disease. *Am J Epidemiol* 2006; 164:263-71.
17. Zhang QL, Koenig W, Raum E, Stegmaier C, Brenner H, Rothenbacher D. Epidemiology of chronic kidney disease: results from a population of older adults in Germany. *Prev Med* 2009; 48:122-7.
18. Roderick PJ, Atkins RJ, Smeeth L, Mylne A, Nitsch DD, Hubbard RB, et al. CKD and mortality risk in older people: a community-based population study in the United Kingdom. *Am J Kidney Dis* 2009; 53:950-60.
19. Nakayama M, Metoki H, Terawaki H, Ohkubo T, Kikuya M, Sato T, et al. Kidney dysfunction as a risk factor for first symptomatic stroke events in a general Japanese population--the Ohasama study. *Nephrol Dial Transplant* 2007; 22:1910-5.
20. Kimm H, Yun JE, Jo J, Jee SH. Low Serum Bilirubin Level as an Independent Predictor of Stroke Incidence: A Prospective Study in Korean Men and Women. *Stroke* 2009; 40:3422-7.
21. Wen CP, Cheng TY, Tsai MK, Chang YC, Chan HT, Tsai SP, et al. All-cause mortality attributable to chronic kidney disease: a prospective cohort study based on 462 293 adults in Taiwan. *Lancet* 2008; 371:2173-82.
22. The National Institute for Health and Clinical Excellence. Chronic kidney disease: early identification and management of chronic kidney disease in adults in primary and secondary care. 2008 [cited 2008 December 29th]; Available from: <http://www.nice.org.uk/nicemedia/pdf/CG073NICEGuideline.pdf>
23. National Kidney Foundation. K/DOQI clinical practice guidelines for chronic kidney disease: evaluation, classification, and stratification. *Am J Kidney Dis* 2002; 39:S1-266.

24. Shlipak MG, Sarnak MJ, Katz R, Fried LF, Seliger SL, Newman AB, et al. Cystatin C and the risk of death and cardiovascular events among elderly persons. *N Engl J Med* 2005; 352:2049-60.
25. Matsushita K, Selvin E, Bash LD, Astor BC, Coresh J. Risk implications of the new CKD-EPI equation as compared to the MDRD Study equation for estimated glomerular filtration rate: the Atherosclerosis Risk in Communities (ARIC) Study. *Am J Kidney Dis* 2010; 55:648-59.
26. Astor BC, Levey AS, Stevens LA, Van Lente F, Selvin E, Coresh J. Method of Glomerular Filtration Rate Estimation Affects Prediction of Mortality Risk. *J Am Soc Nephrol* 2009; 20:2214-22.
27. Ma Y-C, Zuo L, Chen J-H, Luo Q, Yu X-Q, Li Y, et al. Modified Glomerular Filtration Rate Estimating Equation for Chinese Patients with Chronic Kidney Disease. *J Am Soc Nephrol* 2006; 17:2937-44.
